# Supplementary material for: Luminescent cyclometalated alkynylplatinum(ii) complexes with 1,3-di(pyrimidin-2-yl)benzene ligands: synthesis, electrochemistry, photophysics and computational studies
Source: Royal Society of Chemistry journal article supplement (doi:10.1039/d1dt04237h), 2022-01-01
Supplement: d1dt04237h1.pdf [file d1dt04237h1.pdf]

## SUPPORTING INFORMATION

# Luminescent cyclometalated alkynylplatinum(II) complexes with 1,3-di(pyrimidin-2-yl)benzene ligands: synthesis, electrochemistry, photophysics and computational studies

Mariia Hruzd,<sup>a</sup> Nicolas le Poul,<sup>b</sup> Marie Cordier,<sup>a</sup> Samia Kahlal,<sup>a</sup> Jean-Yves Saillard,<sup>a</sup> Sylvain

Achelle,<sup>a\*</sup> Sébastien Gauthier,<sup>a\*</sup> and Françoise Robin-le Guen<sup>a\*</sup>

<sup>a</sup> Univ. Rennes, CNRS, ISCR (Institut des Sciences Chimiques de Rennes) - UMR 6226, F-35000 Rennes, France. E-mails: sylvain.achelle@univ-rennes1.fr, sebastien.gauthier@univ-rennes1.fr francoise.le-guen@univ-rennes1.fr

<sup>b</sup> Laboratoire de Chimie, Électrochimie Moléculaires et Chimie Analytique, UMR CNRS 6521, Université de Bretagne Occidentale, UFR Sciences et Techniques, 6 avenue Victor Le Gorgeu – CS 93837, F-29238 Brest Cedex 3, France.

### Table of content

|                                                                          |    |
|--------------------------------------------------------------------------|----|
| Synthesis of the N <sup>^</sup> C <sup>^</sup> N ligands <b>18-20</b>    | 2  |
| <b>NMR Spectra</b> of ligand <b>20</b>                                   | 3  |
| <b>NMR Spectra</b> of complexes <b>4-14</b>                              | 4  |
| <b>Mass spectra ESI-MS</b> of complexes <b>3-14</b> and ligand <b>20</b> | 15 |
| <b>Crystallographic Data</b> for <b>7</b> and <b>8</b>                   | 17 |
| <b>Additional Cyclic Voltammetry</b>                                     | 19 |
| <b>Additional Photophysical Data</b>                                     | 20 |
| <b>Additional Theoretical Results</b>                                    | 26 |
| <b>References</b>                                                        | 40 |

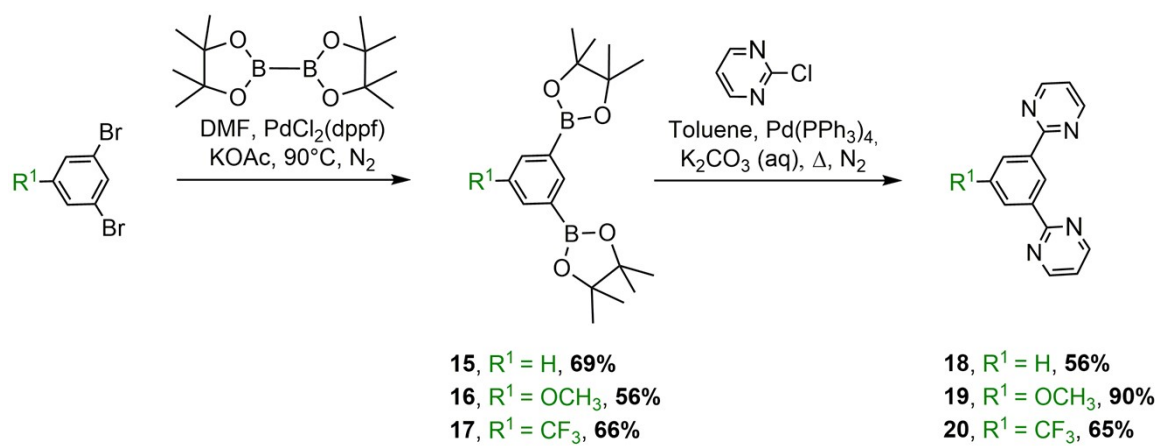

**Scheme S1** Synthesis of the N<sup>C</sup>N ligands **18-20**.

## NMR Spectra of ligand **20**

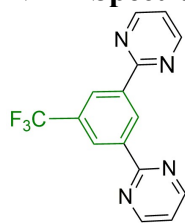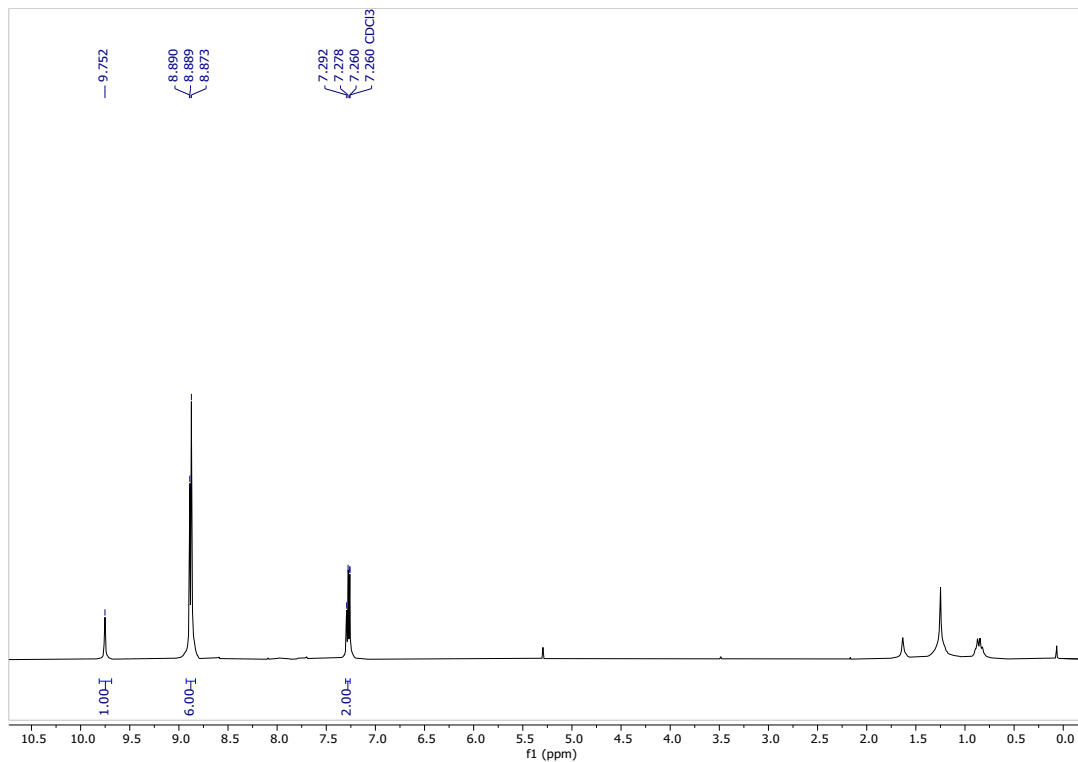

**Fig. S1**  $^1\text{H}$  NMR spectrum (300 MHz,  $\text{CDCl}_3$ ) of **20**.

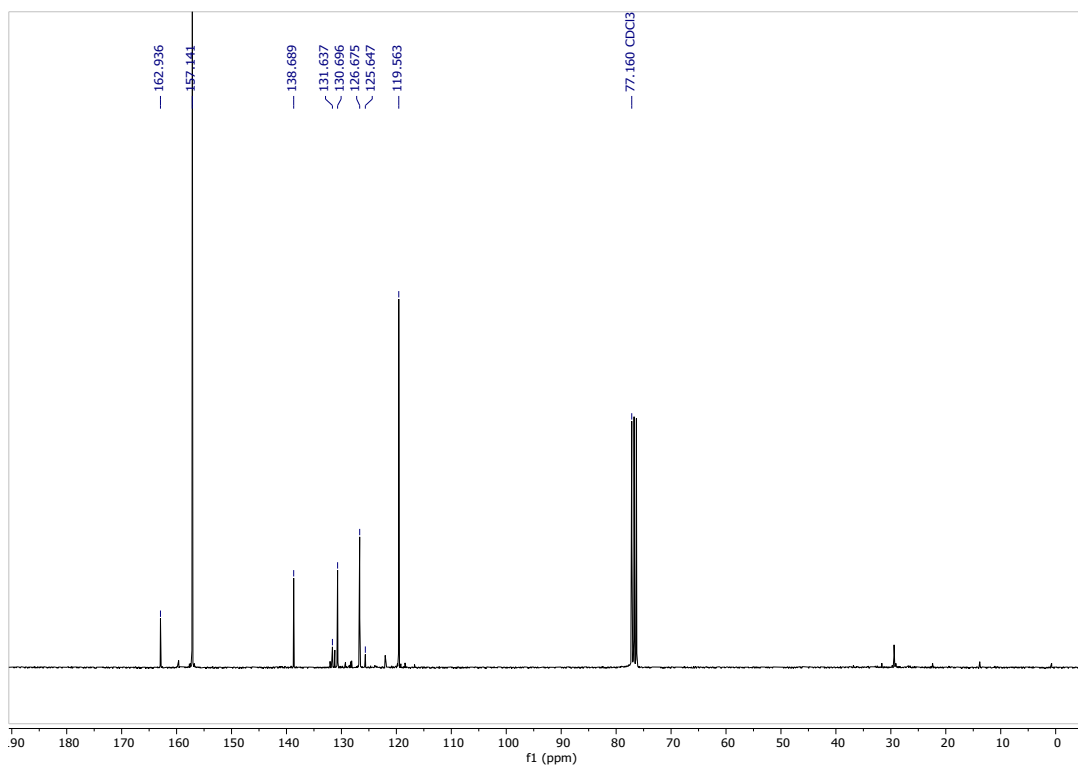

**Fig. S2**  $^{13}\text{C}$  NMR spectrum (75 MHz,  $\text{CDCl}_3$ ) of **20**.

Complex 4

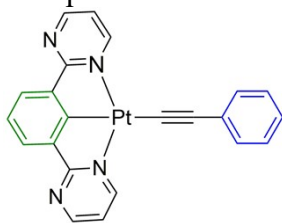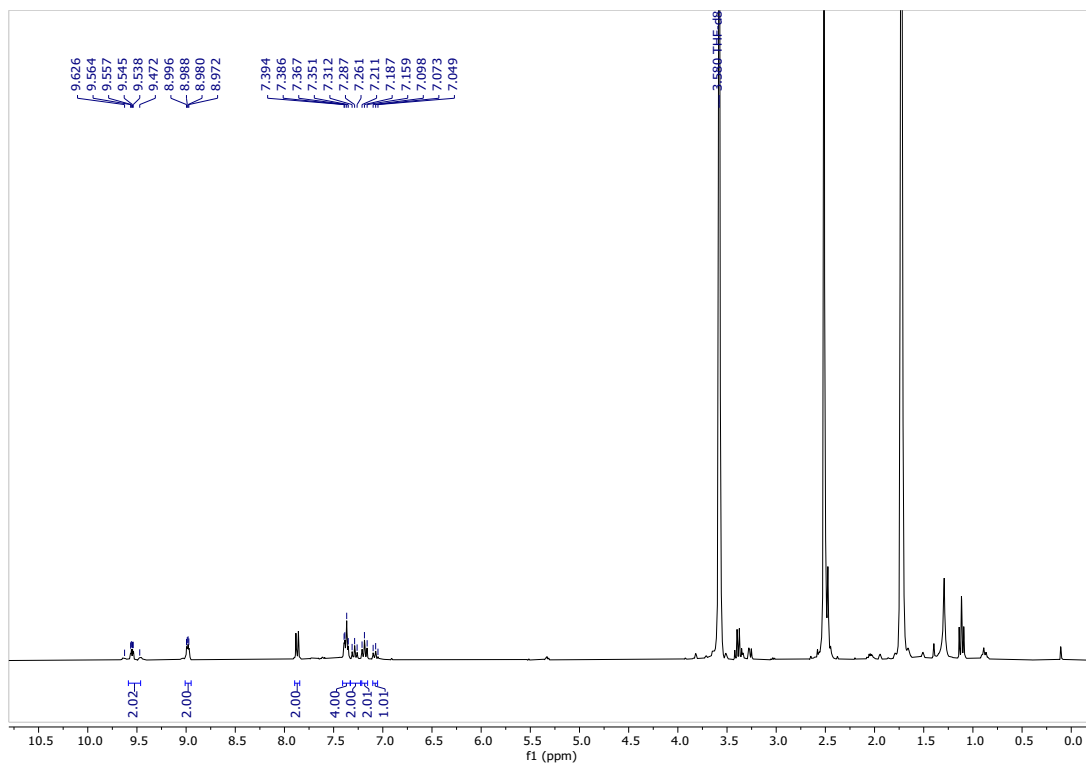

Fig. S3  $^1\text{H}$  NMR spectrum (300 MHz, THF-d8) of 4.

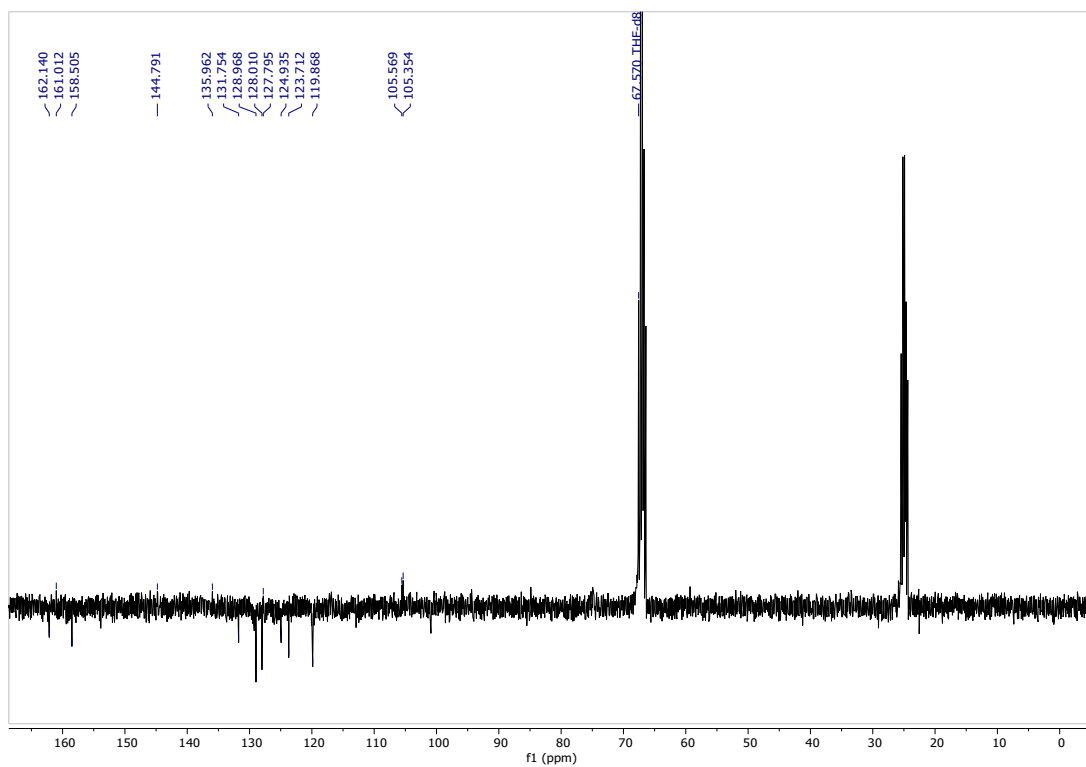

Fig. S4  $^{13}\text{C}$  NMR spectrum (JMOD, 75 MHz, THF-d8) of 4.

### Complex 5

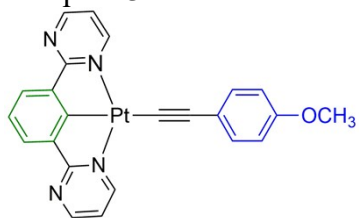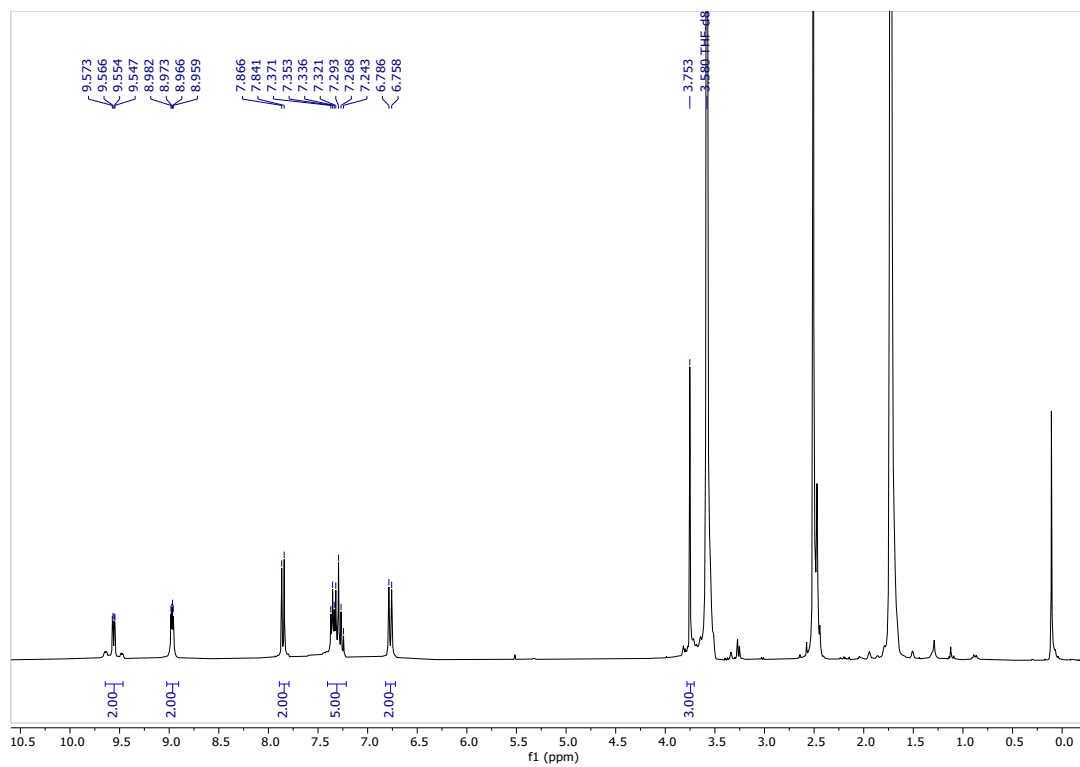

Fig. S5  $^1\text{H}$  NMR spectrum (300 MHz, THF-d8) of 5.

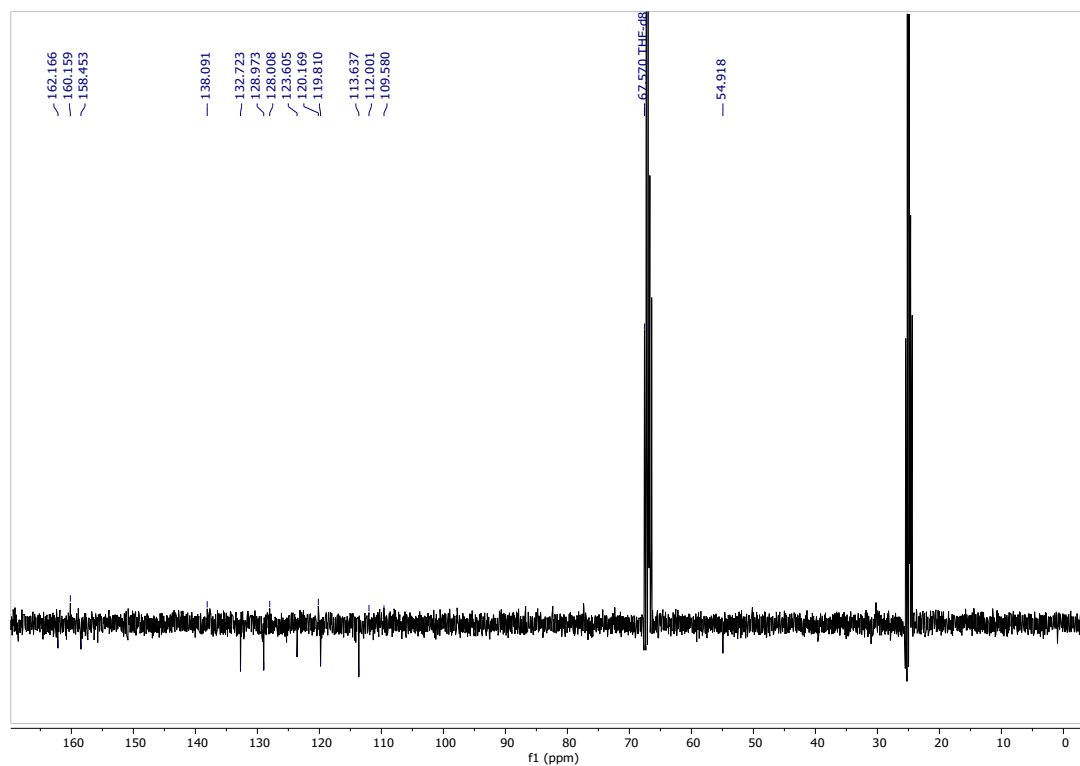

Fig. S6  $^{13}\text{C}$  NMR spectrum (JMOD, 75 MHz, THF-d8) of 5.

### Complex 6

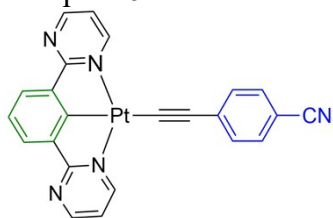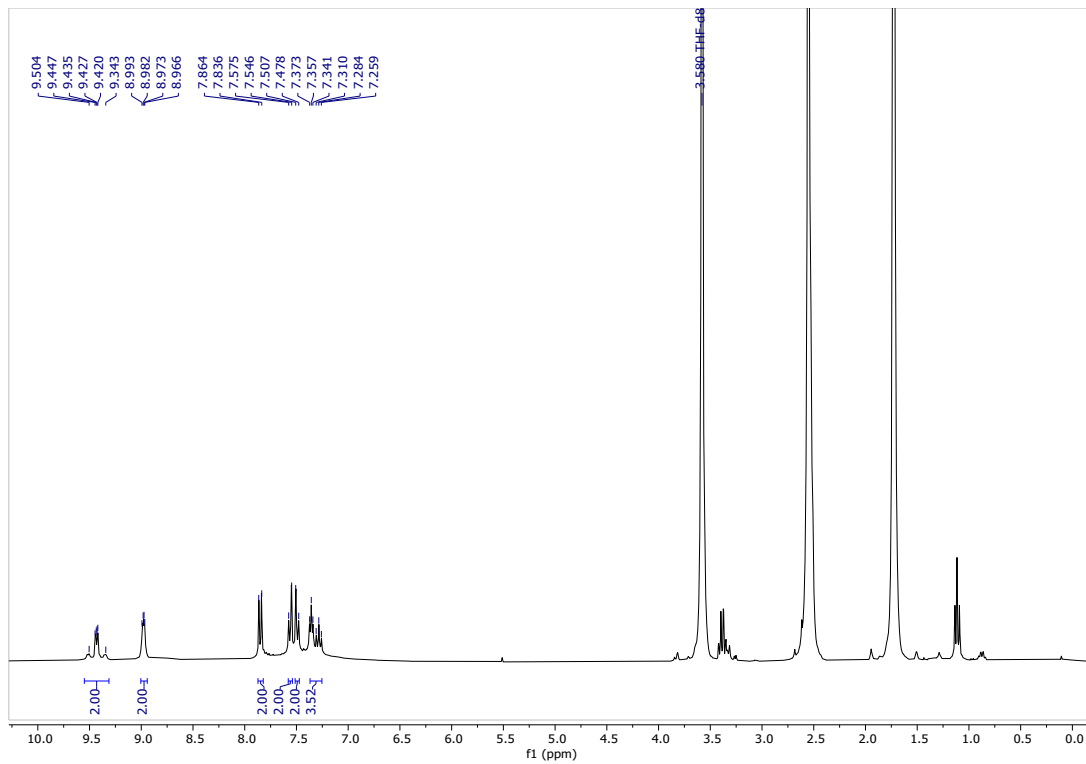

Fig. S7 <sup>1</sup>H NMR spectrum (300 MHz, THF-d<sub>8</sub>) of 6.

Complex 7

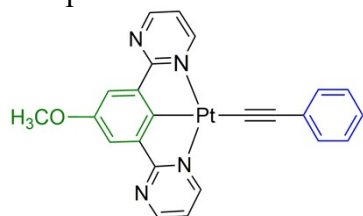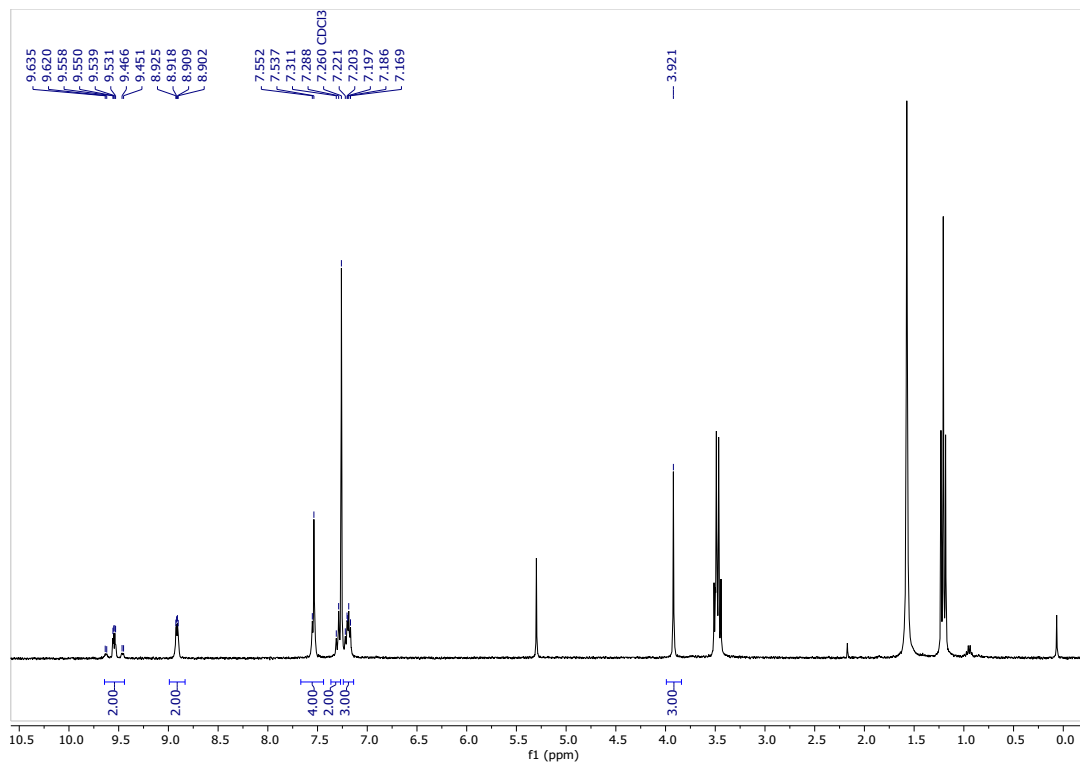

Fig. S8 <sup>1</sup>H NMR spectrum (300 MHz, CDCl<sub>3</sub>) of 7.

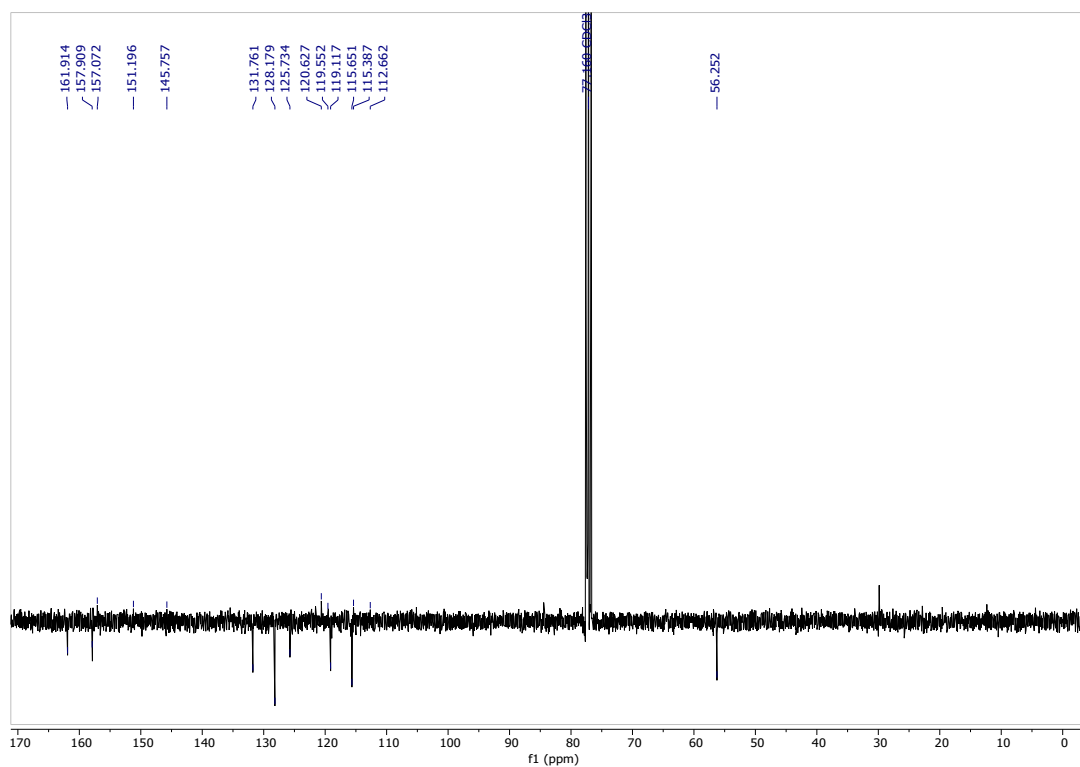

Fig. S9 <sup>13</sup>C NMR spectrum (JMOD, 75 MHz, CDCl<sub>3</sub>) of 7.

### Complex 8

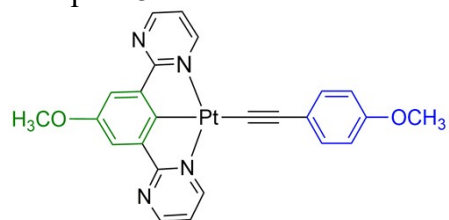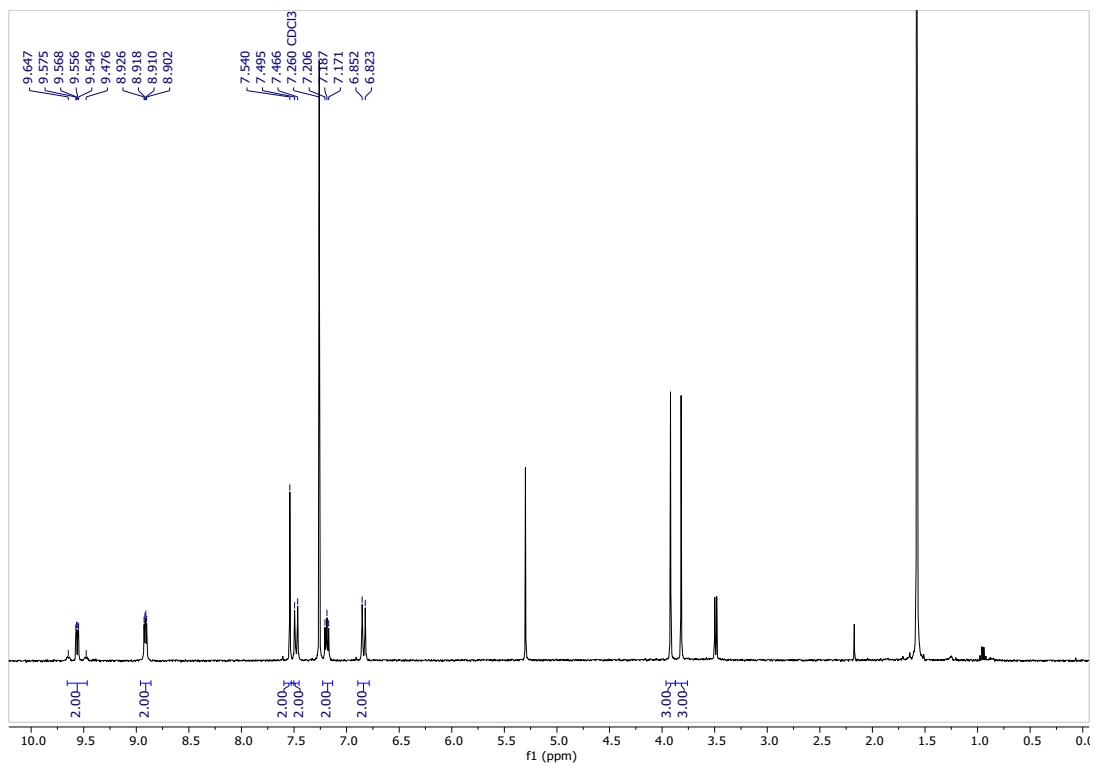

Fig. S10 <sup>1</sup>H NMR spectrum (300 MHz, CDCl<sub>3</sub>) of 8.

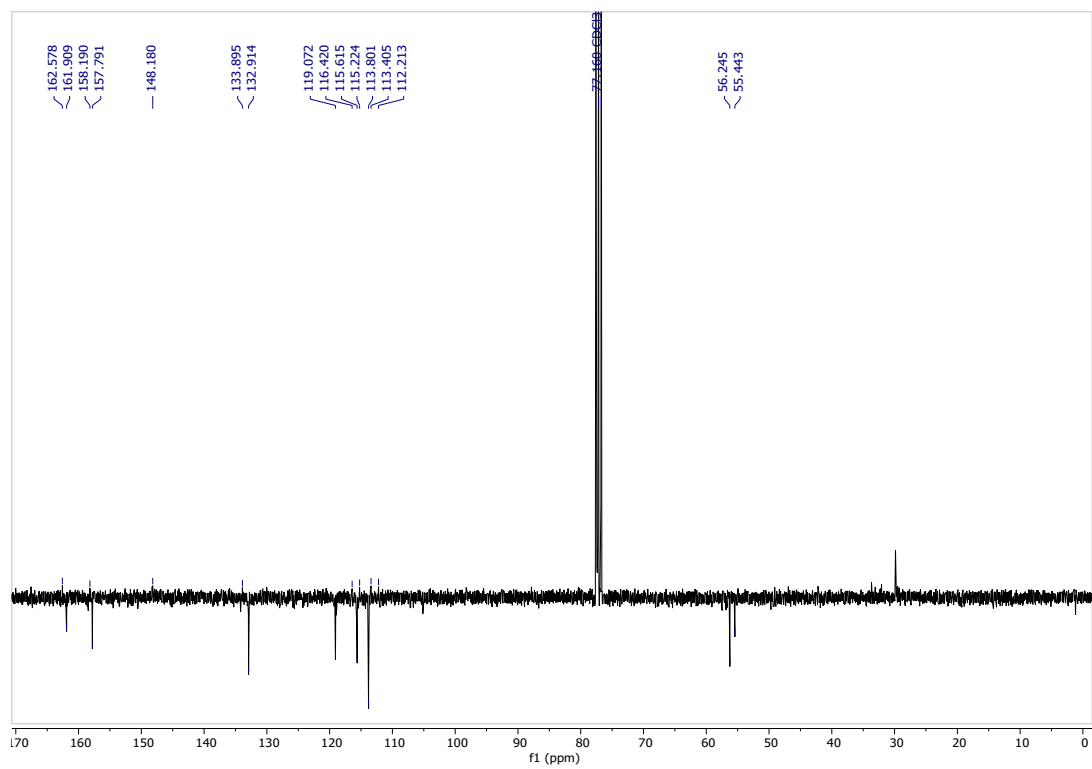

Fig. S11 <sup>13</sup>C NMR spectrum (JMOD, 75 MHz, CDCl<sub>3</sub>) of 8.



Complex 9

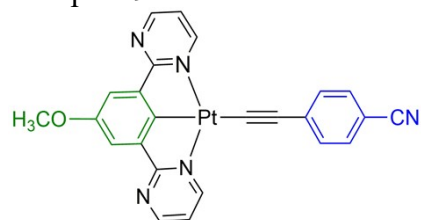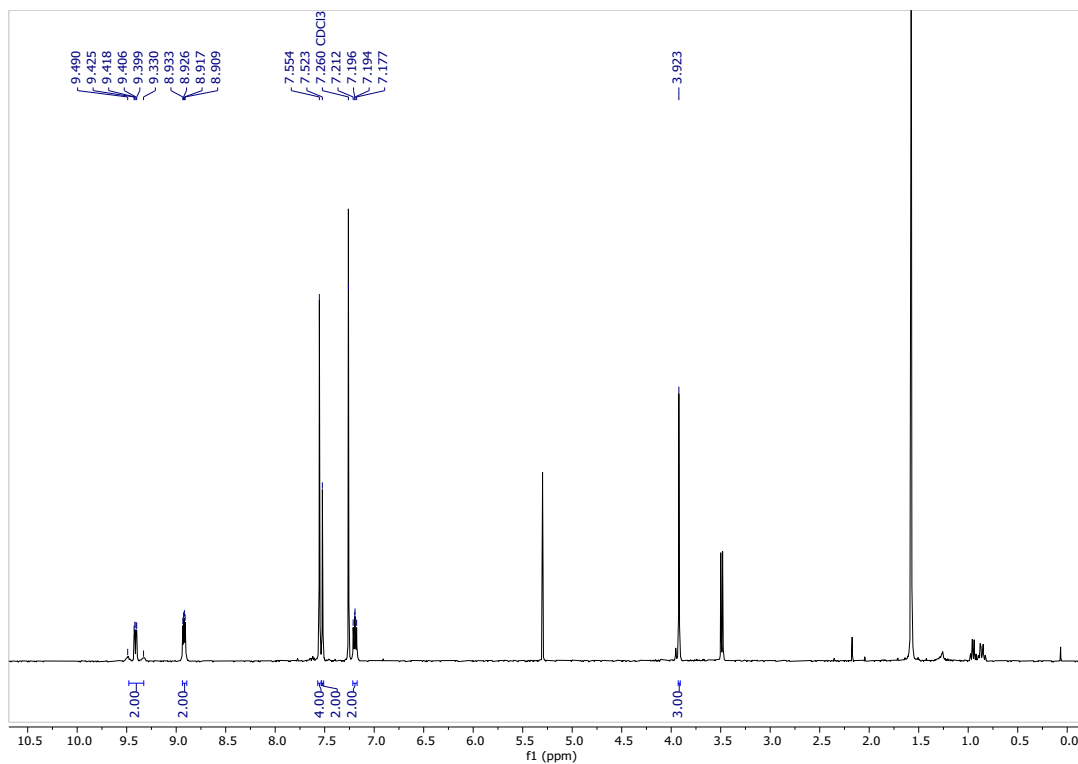

Fig. S12  $^1\text{H}$  NMR spectrum (300 MHz,  $\text{CDCl}_3$ ) of 9.

Complex **10**

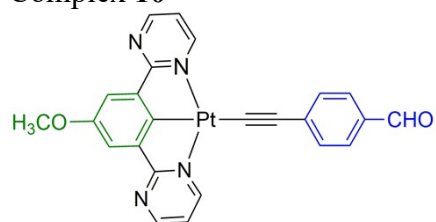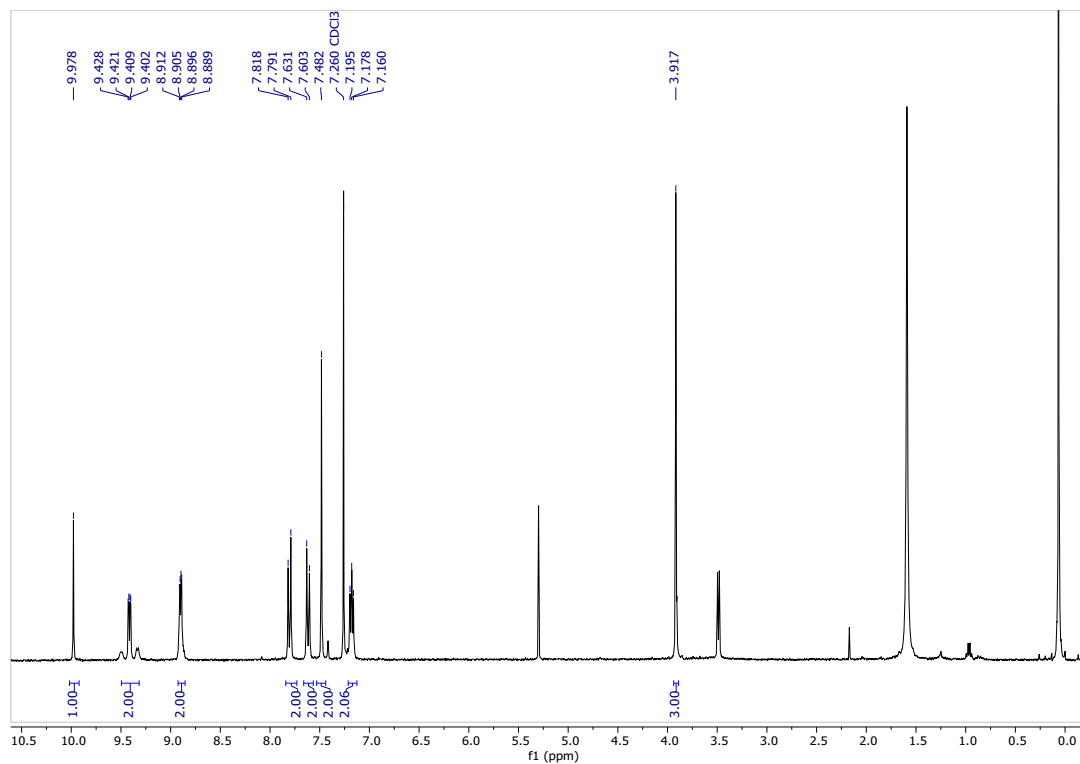

Fig. S13 <sup>1</sup>H NMR spectrum (300 MHz, CDCl<sub>3</sub>) of **10**.

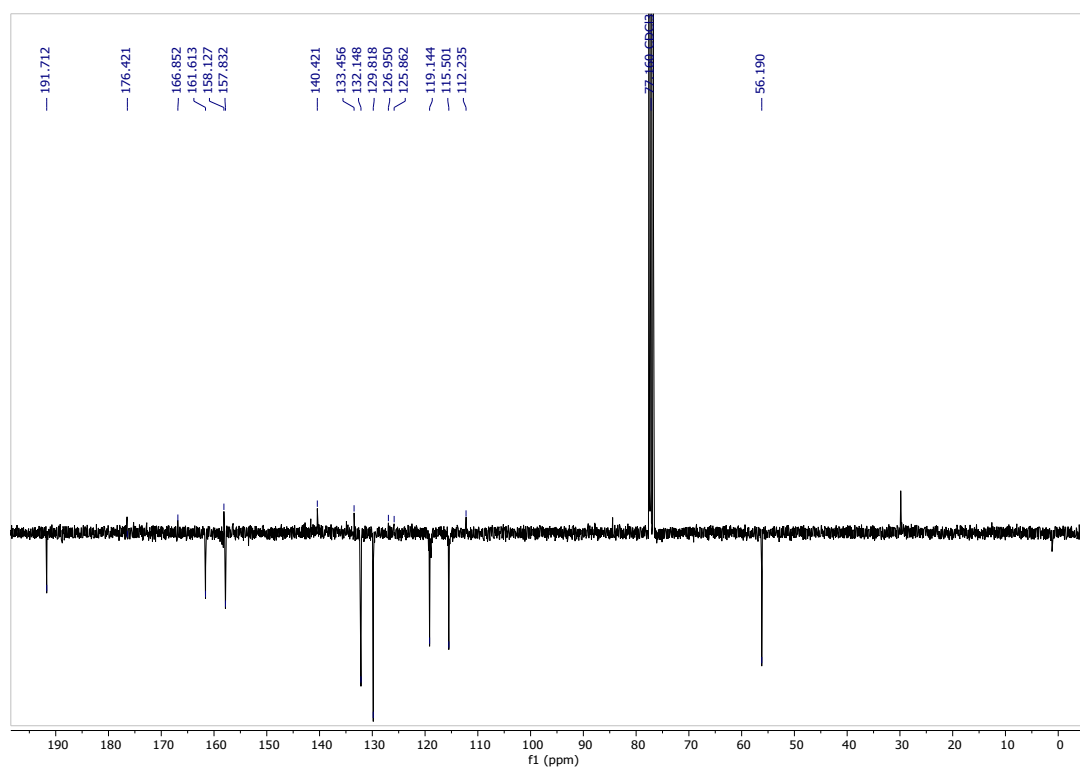

Fig. S14 <sup>13</sup>C NMR spectrum (JMOD, 75 MHz, CDCl<sub>3</sub>) of **10**.

### Complex 11

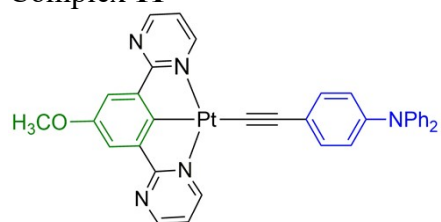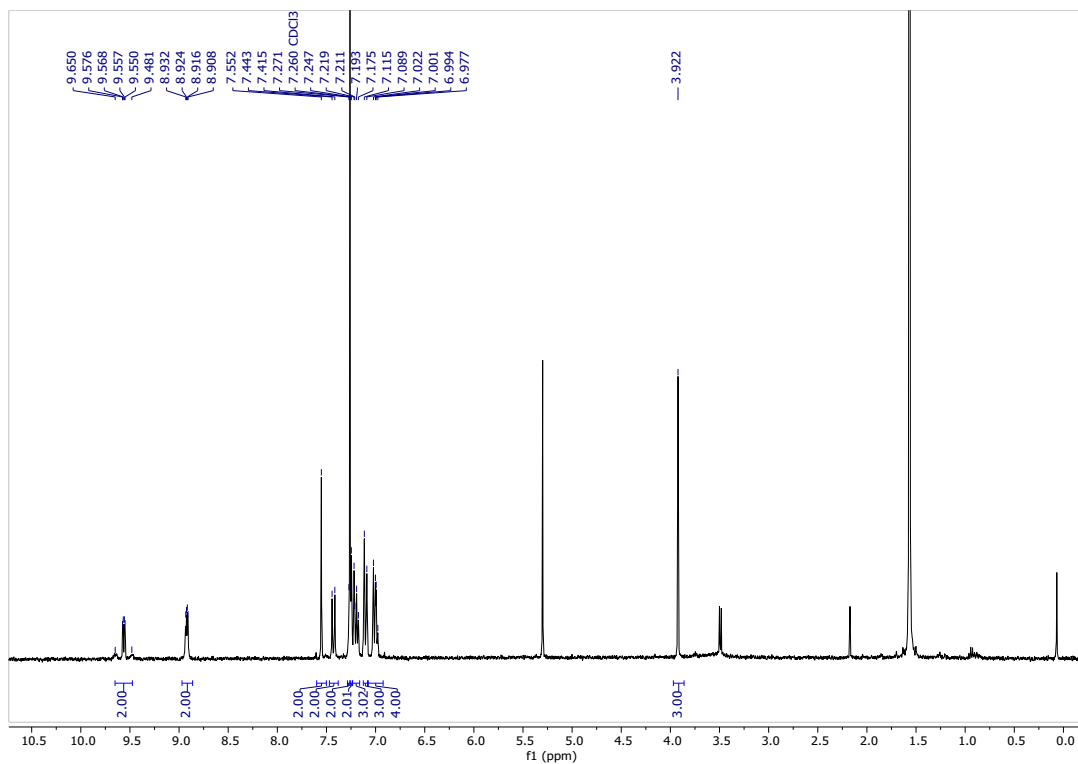

Fig. S15 <sup>1</sup>H NMR spectrum (300 MHz, CDCl<sub>3</sub>) of 11.

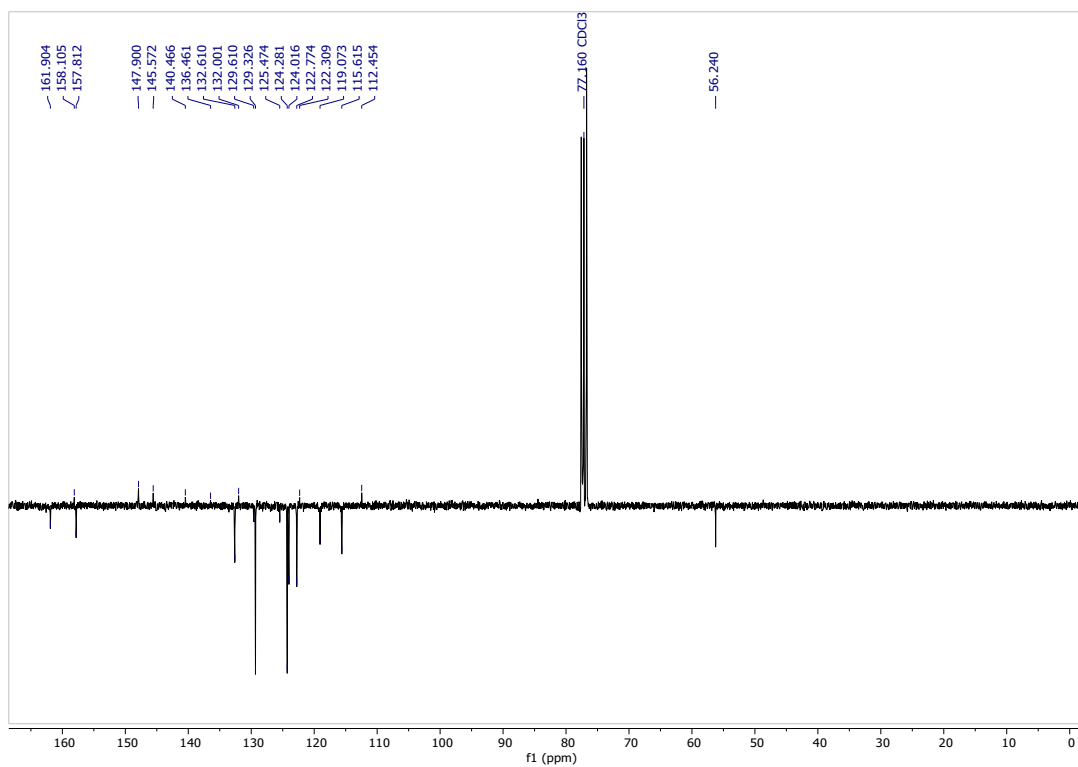

Fig. S16 <sup>13</sup>C NMR spectrum (JMOL, 75 MHz, CDCl<sub>3</sub>) of 11.

Complex 12

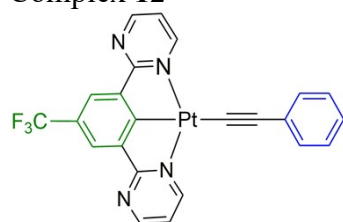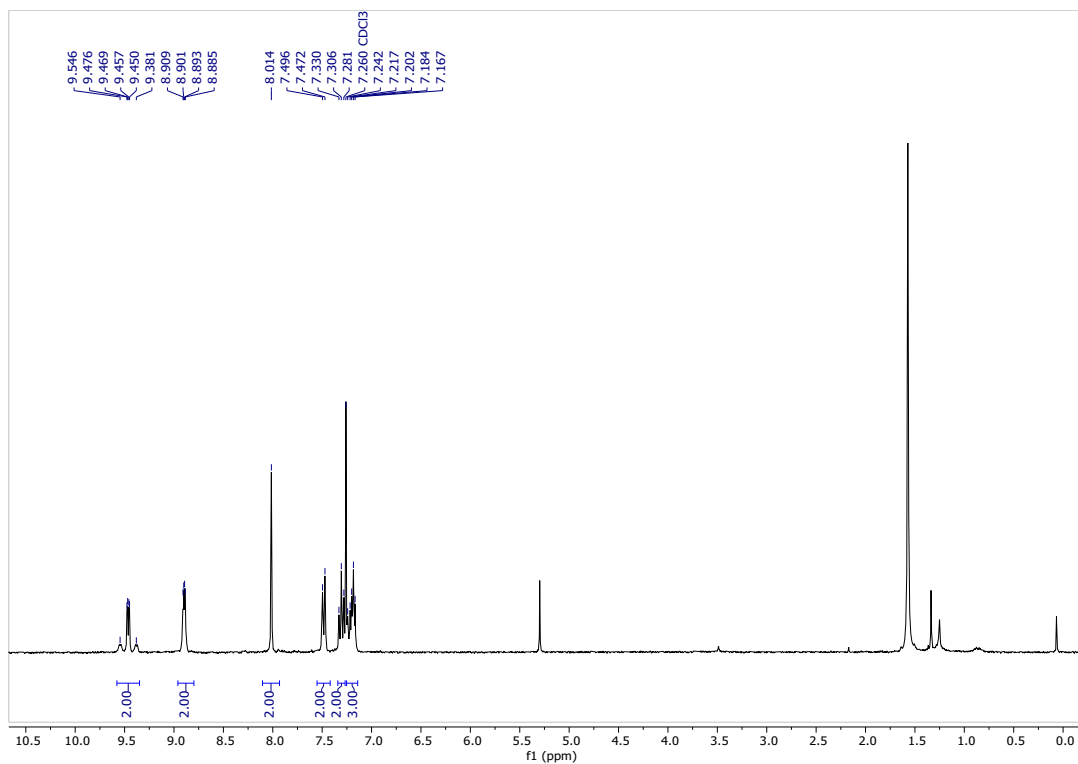

Fig. S17 <sup>1</sup>H NMR spectrum (300 MHz, CDCl<sub>3</sub>) of 12.

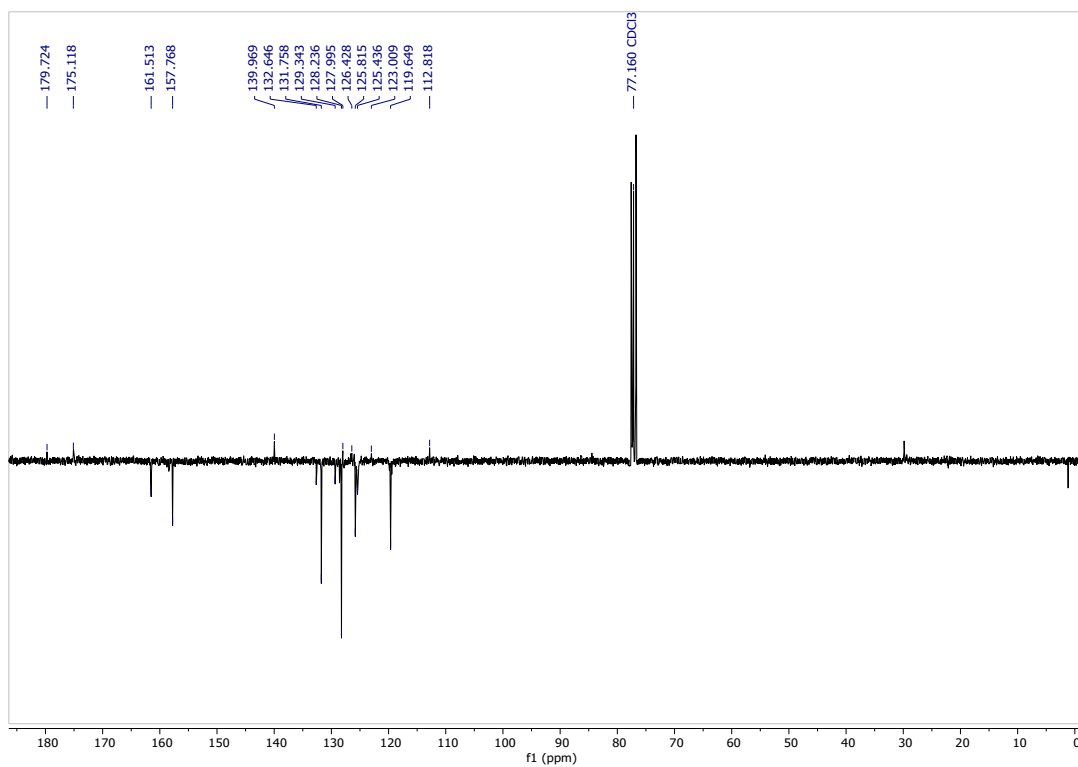

Fig. S18 <sup>13</sup>C NMR spectrum (JMOD, 75 MHz, CDCl<sub>3</sub>) of 12.

### Complex 13

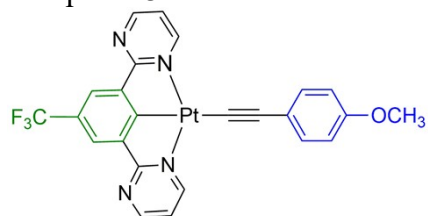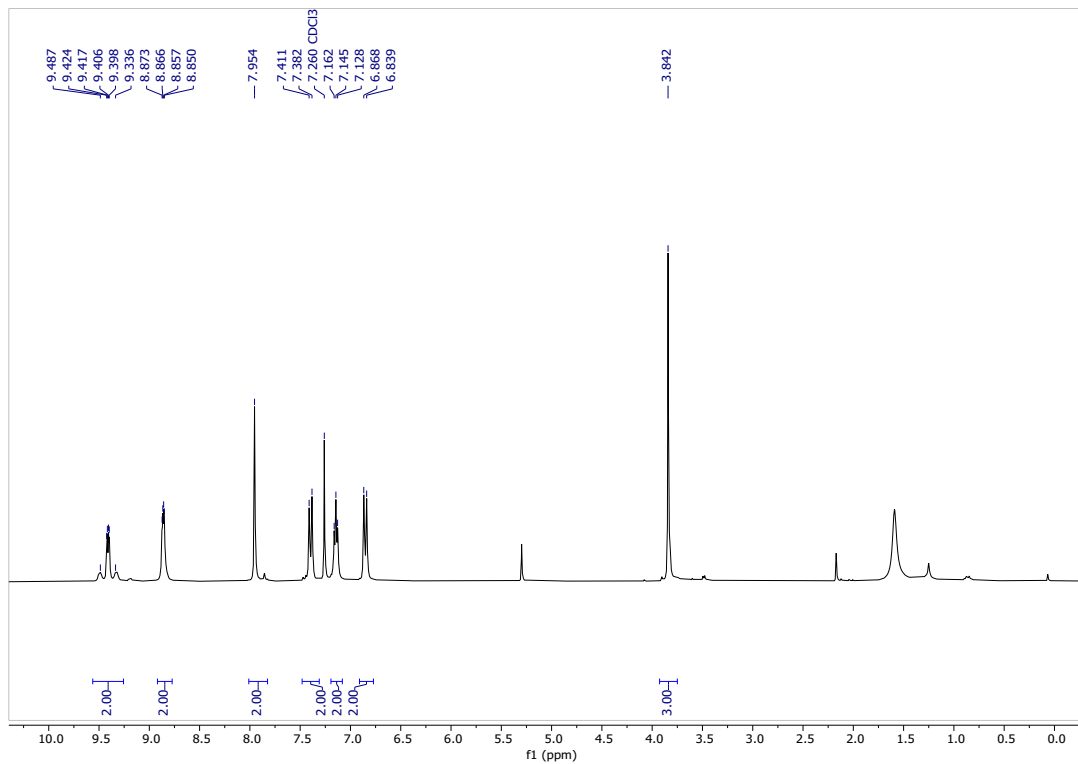

Fig. S19  $^1\text{H}$  NMR spectrum (300 MHz,  $\text{CDCl}_3$ ) of 13.

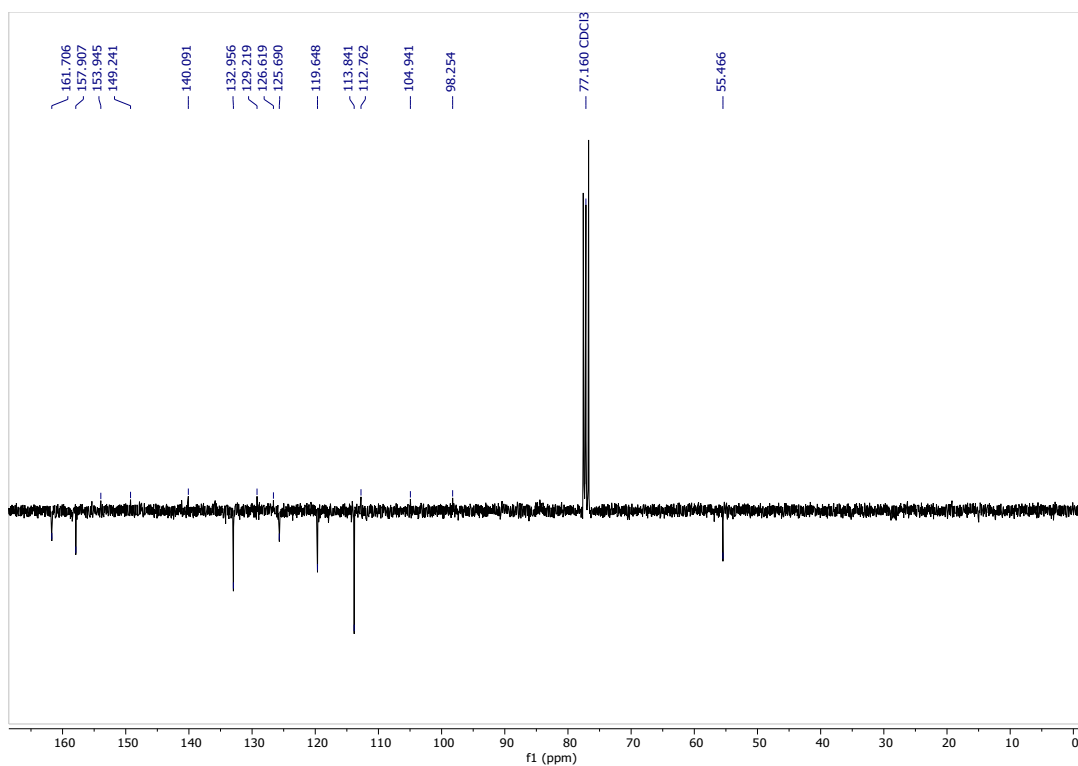

Fig. S20  $^{13}\text{C}$  NMR spectrum (JMOD, 75 MHz,  $\text{CDCl}_3$ ) of 13.

Complex 14

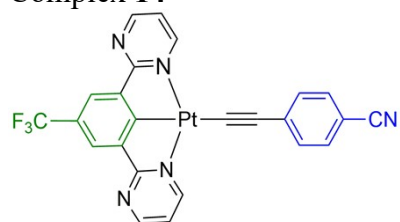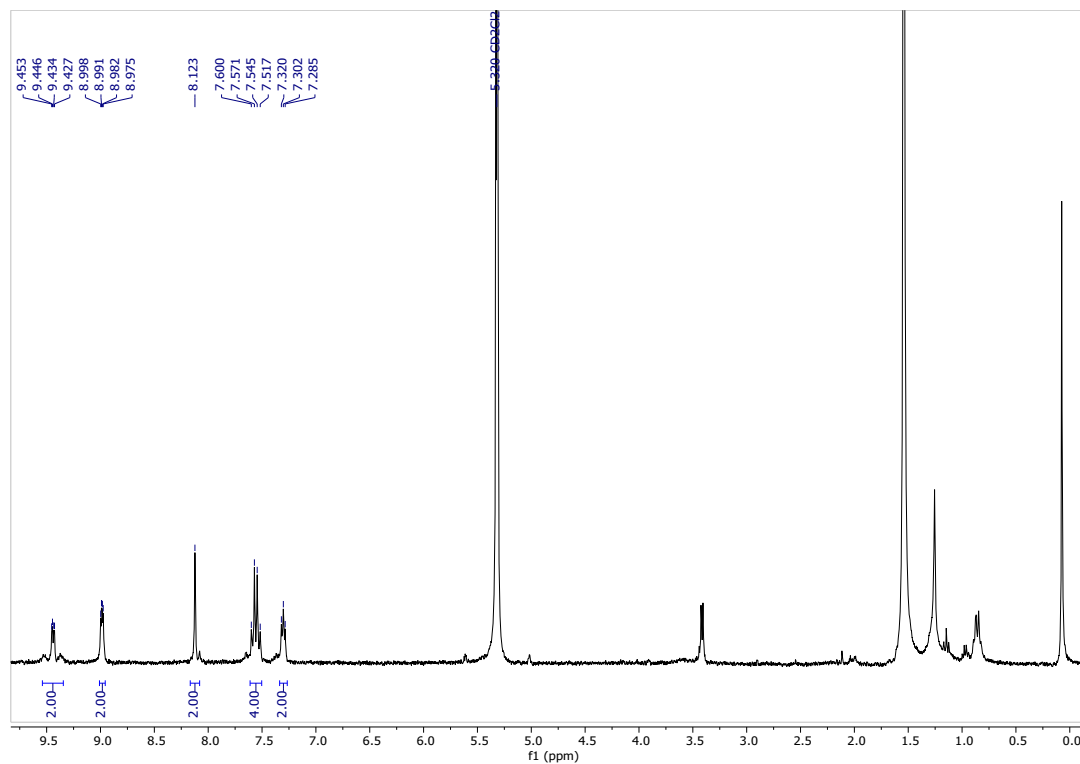

Fig. S21 <sup>1</sup>H NMR spectrum (300 MHz, CDCl<sub>3</sub>) of 14.

**Table S1.** Mass spectra ESI-MS (CH<sub>3</sub>OH/CH<sub>2</sub>Cl<sub>2</sub> : 90/10) of complexes **3-14** and ligand **20**

| No | Mass Spectra                                                                         | Assignment (m/z values)                                                                                                                                                                                                                                                                                                                                                                                                                                                                                                                                                                                                                                                                                                                                                                                                               |
|----|--------------------------------------------------------------------------------------|---------------------------------------------------------------------------------------------------------------------------------------------------------------------------------------------------------------------------------------------------------------------------------------------------------------------------------------------------------------------------------------------------------------------------------------------------------------------------------------------------------------------------------------------------------------------------------------------------------------------------------------------------------------------------------------------------------------------------------------------------------------------------------------------------------------------------------------|
| 3  | 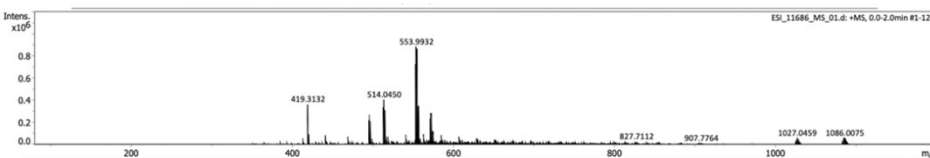   | <p><b>[M+Na]<sup>+</sup>(C<sub>15</sub>H<sub>8</sub>N<sub>4</sub>F<sub>3</sub><sup>35</sup>ClNa<sup>195</sup>Pt)</b><br/>553.9930, found: 553.9932 (0 ppm)<br/> <b>[M<sub>2</sub>+Na]<sup>+</sup>(C<sub>15</sub>H<sub>10</sub>N<sub>4</sub>OF<sub>3</sub><sup>35</sup>ClNa<sup>195</sup>Pt)</b><br/>572.0035, found: 572.0034 (0 ppm)<br/> <b>[M·Cl]<sup>+</sup>(C<sub>15</sub>H<sub>8</sub>N<sub>4</sub>F<sub>3</sub><sup>195</sup>Pt)</b> 496.0343,<br/>found: 496.0343 (0 ppm)</p>                                                                                                                                                                                                                                                                                                                                                 |
| 4  |    | <p><b>[M+Na]<sup>+</sup>(C<sub>22</sub>H<sub>14</sub>N<sub>4</sub>Na<sup>195</sup>Pt)</b> 552.0759,<br/>found: 552.0761 (0 ppm)<br/> <b>[M<sub>2</sub>+Na]<sup>+</sup>(C<sub>22</sub>H<sub>16</sub>N<sub>4</sub>ONa<sup>195</sup>Pt)</b><br/>570.0064, found: 570.0060 (1 ppm)<br/> <b>[M·C<sub>8</sub>H<sub>5</sub>]<sup>+</sup>(C<sub>14</sub>H<sub>9</sub>N<sub>4</sub><sup>195</sup>Pt)</b> 428.0470,<br/>found: 428.0470 (0 ppm)</p>                                                                                                                                                                                                                                                                                                                                                                                             |
| 5  |    | <p><b>[M+Na]<sup>+</sup>(C<sub>23</sub>H<sub>16</sub>N<sub>4</sub>ONa<sup>195</sup>Pt)</b><br/>582.0864, found: 582.868 (1 ppm)<br/> <b>[M<sub>2</sub>+Na]<sup>+</sup>(C<sub>23</sub>H<sub>18</sub>N<sub>4</sub><sup>16</sup>ONa<sup>195</sup>Pt)</b><br/>600.0969, found: 600.0065 (1 ppm)<br/> <b>[M·C<sub>9</sub>H<sub>7</sub>O]<sup>+</sup>(C<sub>14</sub>H<sub>9</sub>N<sub>4</sub><sup>195</sup>Pt)</b> 428.0469,<br/>found: 428.0468 (0 ppm)</p>                                                                                                                                                                                                                                                                                                                                                                               |
| 6  |   | <p><b>[M+Na]<sup>+</sup>(C<sub>23</sub>H<sub>13</sub>N<sub>5</sub>Na<sup>195</sup>Pt)</b> 577.0711,<br/>found: 577.0712 (0 ppm)<br/> <b>[M<sub>2</sub>+Na]<sup>+</sup>(C<sub>23</sub>H<sub>15</sub>N<sub>5</sub>ONa<sup>195</sup>Pt)</b><br/>595.0816, found: 595.0816 (0 ppm)<br/> <b>[M·C<sub>9</sub>H<sub>4</sub>N]<sup>+</sup>(C<sub>14</sub>H<sub>9</sub>N<sub>4</sub><sup>195</sup>Pt)</b> 428.0469,<br/>found: 428.0468 (0 ppm)</p>                                                                                                                                                                                                                                                                                                                                                                                            |
| 7  |  | <p><b>[M+Na]<sup>+</sup>(C<sub>23</sub>H<sub>16</sub>N<sub>4</sub>ONa<sup>195</sup>Pt)</b><br/>582.0864, found: 577.0666 (0 ppm)<br/> <b>[M·C<sub>8</sub>H<sub>5</sub>]<sup>+</sup>(C<sub>15</sub>H<sub>11</sub>N<sub>4</sub>O<sup>195</sup>Pt)</b> 458.0575<br/>found: 458.0570 (1 ppm)<br/> <b>[M+K]<sup>+</sup>(C<sub>23</sub>H<sub>16</sub>N<sub>4</sub>OK<sup>195</sup>Pt)</b> 598.0603<br/>found: 598.0599 (1 ppm)<br/> <b>[M<sub>2</sub>+Na]<sup>+</sup>(C<sub>23</sub>H<sub>18</sub>N<sub>4</sub>O<sub>2</sub>Na<sup>195</sup>Pt)</b><br/>600.0969 found: 600.0963 (1 ppm)<br/> <b>M<sup>+</sup></b> (m/z 559); <b>[M+H]<sup>+</sup></b> (m/z 560),<br/> <b>[L<sub>2</sub>Pt<sub>2</sub>]<sup>+</sup></b> (m/z 558, 660,916); <b>[L<sub>2</sub>Pt<sub>2</sub>L]<sup>+</sup></b><br/>(m/z 1017 base peak, 1118,1219, 1368)</p> |
| 8  |  | <p><b>[M+Na]<sup>+</sup>(C<sub>24</sub>H<sub>18</sub>N<sub>4</sub>O<sub>2</sub>Na<sup>195</sup>Pt)</b><br/>612.0970, found: 612.0977 (1 ppm)<br/> <b>[M·C<sub>9</sub>H<sub>7</sub>O]<sup>+</sup>(C<sub>15</sub>H<sub>11</sub>N<sub>4</sub>O<sup>195</sup>Pt)</b><br/>458.0575 found: 458.055 (0 ppm)<br/> <b>[M<sub>2</sub>+Na]<sup>+</sup>(C<sub>24</sub>H<sub>20</sub>N<sub>4</sub>O<sub>3</sub>Na<sup>195</sup>Pt)</b><br/>630.1075 found: 630.1075 (1 ppm) <b>M<sup>+</sup></b><br/>(m/z 589); <b>[M+H]<sup>+</sup></b> (m/z 590),<br/> <b>[L<sub>2</sub>Pt<sub>2</sub>]<sup>+</sup></b> (m/z 916); <b>[L<sub>2</sub>Pt<sub>2</sub>L]<sup>+</sup></b> (m/z<br/>1047 base peak)</p>                                                                                                                                                |

|    |                                                                                      |                                                                                                                                                                                                                                                                                                                                                                                                                                                                                                                                                                                                                                                                                                                                                                                                                                       |
|----|--------------------------------------------------------------------------------------|---------------------------------------------------------------------------------------------------------------------------------------------------------------------------------------------------------------------------------------------------------------------------------------------------------------------------------------------------------------------------------------------------------------------------------------------------------------------------------------------------------------------------------------------------------------------------------------------------------------------------------------------------------------------------------------------------------------------------------------------------------------------------------------------------------------------------------------|
| 9  | 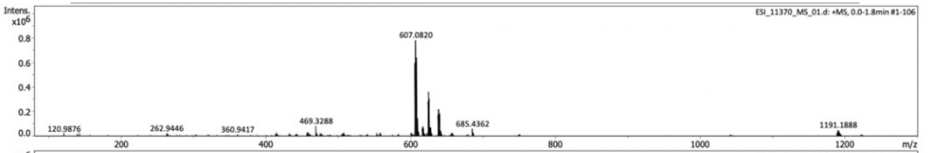   | <p><b>[M+Na]<sup>+</sup>(C<sub>24</sub>H<sub>15</sub>N<sub>5</sub>O<sub>2</sub>Na<sup>195</sup>Pt)</b><br/>607.0817, found: 607.0820 (0 ppm)</p> <p><b>[M<sub>2</sub>+Na]<sup>+</sup>(C<sub>24</sub>H<sub>17</sub>N<sub>5</sub>O<sub>2</sub>Na<sup>195</sup>Pt)</b><br/>625.0922 found: 625.0925 (0 ppm)</p> <p><b>[M<sub>3</sub>+Na]<sup>+</sup>(C<sub>25</sub>H<sub>19</sub>N<sub>5</sub>O<sub>2</sub>Na<sup>195</sup>Pt)</b><br/>639.1079 found: 639.1079 (0 ppm)</p> <p><b>[M<sub>3</sub>+H]<sup>+</sup>(C<sub>25</sub>H<sub>20</sub>N<sub>5</sub>O<sub>2</sub><sup>195</sup>Pt)</b> 617.1259<br/>found: 617.1259 (0 ppm)</p> <p><b>M<sup>+</sup></b> (m/z 584); <b>[M+H]<sup>+</sup></b> (m/z 585),<br/><b>[LPt]<sup>+</sup></b> (m/z 458); <b>[L<sub>2</sub>Pt<sub>2</sub>L]<sup>+</sup></b> (m/z 1042<br/>base peak, 1074)</p> |
| 10 |    | <p><b>[M+Na]<sup>+</sup>(C<sub>24</sub>H<sub>16</sub>N<sub>4</sub>O<sub>2</sub>Na<sup>195</sup>Pt)</b><br/>610.0813, found: 610.0816 (0 ppm)</p> <p><b>[M<sub>2</sub>+Na]<sup>+</sup>(C<sub>24</sub>H<sub>18</sub>N<sub>4</sub>O<sub>3</sub>Na<sup>195</sup>Pt)</b><br/>628.0919 found: 628.0907 (2 ppm)</p> <p><b>[M<sub>3</sub>+Na]<sup>+</sup>(C<sub>25</sub>H<sub>20</sub>N<sub>4</sub>O<sub>3</sub>Na<sup>195</sup>Pt)</b><br/>642.1075 found: 642.1066 (2 ppm) <b>M<sup>+</sup></b><br/>(m/z 587); <b>[LPt]<sup>+</sup></b> (m/z 458.); <b>[L<sub>2</sub>Pt<sub>2</sub>L]<sup>+</sup></b><br/>(m/z 708,716,837,916), <b>[L<sub>2</sub>Pt<sub>2</sub>L]<sup>+</sup></b> (m/z<br/>1045 base peak, 1173)</p>                                                                                                                       |
| 11 |    | <p><b>[M+Na]<sup>+</sup>(C<sub>35</sub>H<sub>25</sub>N<sub>5</sub>O<sub>2</sub>Na<sup>195</sup>Pt)</b><br/>749.6000, found 749.1603 (0 ppm) <b>[M-<br/>C<sub>20</sub>H<sub>14</sub>N]<sup>+</sup>(C<sub>15</sub>H<sub>11</sub>N<sub>4</sub>O<sup>195</sup>Pt)</b> 458.0575<br/>found: 458.0579 (1 ppm)</p> <p><b>[M<sub>2</sub>+Na]<sup>+</sup>(C<sub>35</sub>H<sub>27</sub>N<sub>5</sub>O<sub>2</sub>Na<sup>195</sup>Pt)</b><br/>767.1704 found: 767.1793 (2 ppm) <b>M<sup>+</sup></b><br/>(m/z 726); <b>[L<sub>2</sub>Pt<sub>2</sub>L]<sup>+</sup></b> (m/z 916),<br/><b>[L<sub>2</sub>Pt<sub>2</sub>L]<sup>+</sup></b> (m/z 101184 base peak)</p>                                                                                                                                                                                  |
| 12 |  | <p><b>[M+Na]<sup>+</sup>(C<sub>23</sub>H<sub>13</sub>N<sub>4</sub>F<sub>3</sub>Na<sup>195</sup>Pt)</b><br/>620.0632, found: 620.0633 (0 ppm)</p> <p><b>[M+K]<sup>+</sup>(C<sub>23</sub>H<sub>13</sub>N<sub>4</sub>F<sub>3</sub>K<sup>195</sup>Pt)</b> 636.0371<br/>found: 636.0365 (1 ppm)</p> <p><b>[M<sub>2</sub>+Na]<sup>+</sup>(C<sub>23</sub>H<sub>15</sub>N<sub>4</sub>OF<sub>3</sub>Na<sup>195</sup>Pt)</b><br/>638.0738 found: 638.0732 (1 ppm)</p> <p><b>[M-C<sub>8</sub>H<sub>5</sub>]<sup>+</sup>(C<sub>15</sub>H<sub>8</sub>N<sub>4</sub>F<sub>3</sub><sup>195</sup>Pt)</b> 496.0343<br/>found: 496.0334 (2 ppm)</p>                                                                                                                                                                                                      |
| 13 |  | <p><b>[M+Na]<sup>+</sup>(C<sub>24</sub>H<sub>15</sub>N<sub>4</sub>O<sub>2</sub>F<sub>3</sub>Na<sup>195</sup>Pt)</b><br/>650.0738, found: 650.0734 (1 ppm)</p> <p><b>[M<sub>2</sub>+Na]<sup>+</sup>(C<sub>24</sub>H<sub>17</sub>N<sub>4</sub>O<sub>2</sub>F<sub>3</sub>Na<sup>195</sup>Pt)</b><br/>688.0843 found: 688.0833 (2 ppm)</p> <p><b>[M<sub>3</sub>+Na]<sup>+</sup>(C<sub>31</sub>H<sub>19</sub>N<sub>4</sub>O<sub>3</sub>F<sub>3</sub>Na<sup>195</sup>Pt)</b><br/>770.0949 found: 770.0942 (1 ppm)</p>                                                                                                                                                                                                                                                                                                                       |
| 14 |  | <p><b>[M+Na]<sup>+</sup>(C<sub>24</sub>H<sub>12</sub>N<sub>5</sub>F<sub>3</sub>Na<sup>195</sup>Pt)</b><br/>645.0585, found: 645.0590 (1 ppm)</p> <p><b>[M<sub>2</sub>+Na]<sup>+</sup>(C<sub>24</sub>H<sub>14</sub>N<sub>5</sub>OF<sub>3</sub>Na<sup>195</sup>Pt)</b><br/>663.0691 found: 663.0695 (1 ppm)</p> <p><b>[M-C<sub>9</sub>H<sub>4</sub>N]<sup>+</sup>(C<sub>15</sub>H<sub>8</sub>N<sub>4</sub>F<sub>3</sub><sup>195</sup>Pt)</b><br/>496.0343 found: 496.0339 (1 ppm)</p>                                                                                                                                                                                                                                                                                                                                                   |
| 20 |  | <p><b>[M+Na]<sup>+</sup>(C<sub>15</sub>H<sub>9</sub>N<sub>4</sub>F<sub>3</sub>Na)</b> 325.0673,<br/>found: 325.0672 (0 ppm)</p>                                                                                                                                                                                                                                                                                                                                                                                                                                                                                                                                                                                                                                                                                                       |



## Crystallographic Data for 7 and 8

**Complex 7: crystal Data** for  $C_{23}H_{16}N_4O$  Pt, ( $M = 559.49$ ), monoclinic, space group  $C 2/c$  (I.T.#15),  $a = 24.768(3)$ ,  $b = 10.8889(13)$ ,  $c = 13.8726(19)\text{\AA}$ ,  $\beta = 92.343(6)^\circ$ ,  $V = 3738.3(8)\text{\AA}^3$ .  $Z = 8$ ,  $d = 1.988\text{ g.cm}^{-3}$ ,  $\mu = 7.530\text{ mm}^{-1}$ . The structure was solved by dual-space algorithm using the *SHELXT* program,<sup>[1]</sup> and then refined with full-matrix least-square methods based on  $F^2$  (*SHELXL*).<sup>[2]</sup> All non-hydrogen atoms were refined with anisotropic atomic displacement parameters. H atoms were finally included in their calculated positions. A final refinement on  $F^2$  with 4245 unique intensities and 221 parameters converged at  $\omega R(F^2) = 0.0965$  ( $R(F) = 0.0467$ ) for 2978 observed reflections with  $I > 2\sigma(I)$ .

**Table S2.** Crystallographic data for 7.

|                                      |                                                     |                           |
|--------------------------------------|-----------------------------------------------------|---------------------------|
| Compound                             | 7                                                   |                           |
| Empirical formula                    | C <sub>23</sub> H <sub>16</sub> N <sub>4</sub> O Pt |                           |
| CCDC                                 | 2126978                                             |                           |
| Formula weight                       | 559.49                                              |                           |
| Temperature                          | 150 K                                               |                           |
| Wavelength                           | 0.71073 Å                                           |                           |
| Crystal system                       | Monoclinic                                          |                           |
| Space group                          | $C 2/c$                                             |                           |
| Unit cell dimensions                 | $a = 24.768(3)\text{\AA}$                           | $\alpha = 90^\circ$       |
|                                      | $b = 10.8889(13)\text{\AA}$                         | $\beta = 92.343(6)^\circ$ |
|                                      | $c = 13.8726(19)\text{\AA}$                         | $\gamma = 90^\circ$       |
| Volume                               | $3738.3(8)\text{\AA}^3$                             |                           |
| Z                                    | 8                                                   |                           |
| Density (calculated)                 | $1.988\text{ g/cm}^3$                               |                           |
| Absorption coefficient               | $7.530\text{ mm}^{-1}$                              |                           |
| F(000)                               | 2144                                                |                           |
| Crystal size                         | 0.160 x 0.150 x 0.130 mm                            |                           |
| Crystal color                        | orange                                              |                           |
| Theta range for data collection      | 2.497 to 27.473°.                                   |                           |
| Index ranges                         | -22 ≤ h ≤ 31, -14 ≤ k ≤ 14, -16 ≤ l ≤ 17            |                           |
| Reflections collected                | 12914                                               |                           |
| Independent reflections              | 4245 [R(int) = 0.0636]                              |                           |
| Reflections [ $I > 2\sigma(I)$ ]     | 2978                                                |                           |
| Completeness to theta max            | 99.0 %                                              |                           |
| Absorption correction                | multi-scan                                          |                           |
| Max. and min. transmission           | 0.376 and 0.297                                     |                           |
| Refinement method                    | Full-matrix least-squares on $F^2$                  |                           |
| Data / restraints / parameters       | 4245 / 1 / 221                                      |                           |
| Goodness-of-fit on $F^2$             | 1.031                                               |                           |
| Final R indices [ $I > 2\sigma(I)$ ] | R1 = 0.0467, wR2 = 0.0965                           |                           |
| R indices (all data)                 | R1 = 0.0773, wR2 = 0.1078                           |                           |
| Largest diff. peak and hole          | 2.575 and -1.931 e.Å <sup>-3</sup>                  |                           |

**Complex 8: crystal Data** for C<sub>24</sub> H<sub>18</sub> N<sub>4</sub> O<sub>2</sub> Pt, (*M* = 589.51), monoclinic, space group *P* 2<sub>1</sub>/*c* (I.T.#14), *a* = 12.4772(12), *b* = 7.8562(5), *c* = 20.3724(18) Å,  $\alpha = 90$ ,  $\beta = 94.458(6)$ ,  $\gamma = 90$  °, *V* = 1990.9(3) Å<sup>3</sup>. *Z* = 4, *d* = 1.967 g.cm<sup>-3</sup>,  $\mu = 7.078$  mm<sup>-1</sup>. The structure was solved by dual-space algorithm using the SHELXT program,<sup>[1]</sup> and then refined with full-matrix least-square methods based on *F*<sup>2</sup> (SHELXL).<sup>[2]</sup> All non-hydrogen atoms were refined with anisotropic atomic displacement parameters. H atoms were finally included in their calculated positions. A final refinement on *F*<sup>2</sup> with 3675 unique intensities and 282 parameters converged at  $\omega R(F^2) = 0.0852$  (*R*(*F*) = 0.0424) for 2555 observed reflections with *I* > 2 $\sigma$ (*I*).

**Table S3.** Crystallographic data for **8**.

|                                                              |                                                                  |                             |
|--------------------------------------------------------------|------------------------------------------------------------------|-----------------------------|
| Compound                                                     | <b>8</b>                                                         |                             |
| Empirical formula                                            | C <sub>24</sub> H <sub>18</sub> N <sub>4</sub> O <sub>2</sub> Pt |                             |
| CCDC                                                         | 2126979                                                          |                             |
| Formula weight                                               | 589.51                                                           |                             |
| Temperature                                                  | 150 K                                                            |                             |
| Wavelength                                                   | 0.71073 Å                                                        |                             |
| Crystal system                                               | Monoclinic                                                       |                             |
| Space group                                                  | <i>P</i> 2 <sub>1</sub> / <i>c</i>                               |                             |
| Unit cell dimensions                                         | <i>a</i> = 12.4772(12) Å                                         | $\alpha = 90^\circ$ .       |
|                                                              | <i>b</i> = 7.8562(5) Å                                           | $\beta = 94.458(6)^\circ$ . |
|                                                              | <i>c</i> = 20.3724(18) Å                                         | $\gamma = 90^\circ$ .       |
| Volume                                                       | 1990.9(3) Å <sup>3</sup>                                         |                             |
| <i>Z</i>                                                     | 4                                                                |                             |
| Density (calculated)                                         | 1.967 g/cm <sup>3</sup>                                          |                             |
| Absorption coefficient                                       | 7.078 mm <sup>-1</sup>                                           |                             |
| <i>F</i> (000)                                               | 1136                                                             |                             |
| Crystal size                                                 | 0.230 x 0.090 x 0.040 mm                                         |                             |
| Crystal color                                                | orange                                                           |                             |
| Theta range for data collection                              | 2.686 to 25.681°.                                                |                             |
| Index ranges                                                 | -16 ≤ <i>h</i> ≤ 16, 0 ≤ <i>k</i> ≤ 10, 0 ≤ <i>l</i> ≤ 26        |                             |
| Reflections collected                                        | 3675                                                             |                             |
| Independent reflections                                      | 3675 [ <i>R</i> (int) = 0.0903]                                  |                             |
| Reflections [ <i>I</i> > 2 $\sigma$ ( <i>I</i> )]            | 2555                                                             |                             |
| Completeness to theta max                                    | 97.1 %                                                           |                             |
| Absorption correction                                        | multi-scan                                                       |                             |
| Max. and min. transmission                                   | 0.753 and 0.410                                                  |                             |
| Refinement method                                            | Full-matrix least-squares on <i>F</i> <sup>2</sup>               |                             |
| Data / restraints / parameters                               | 3675 / 0 / 282                                                   |                             |
| Goodness-of-fit on <i>F</i> <sup>2</sup>                     | 0.949                                                            |                             |
| Final <i>R</i> indices [ <i>I</i> > 2 $\sigma$ ( <i>I</i> )] | <i>R</i> 1 = 0.0424, <i>wR</i> 2 = 0.0852                        |                             |
| <i>R</i> indices (all data)                                  | <i>R</i> 1 = 0.0778, <i>wR</i> 2 = 0.0930                        |                             |
| Largest diff. peak and hole                                  | 1.446 and -1.360 e.Å <sup>-3</sup>                               |                             |

## Additional Cyclic Voltammetry

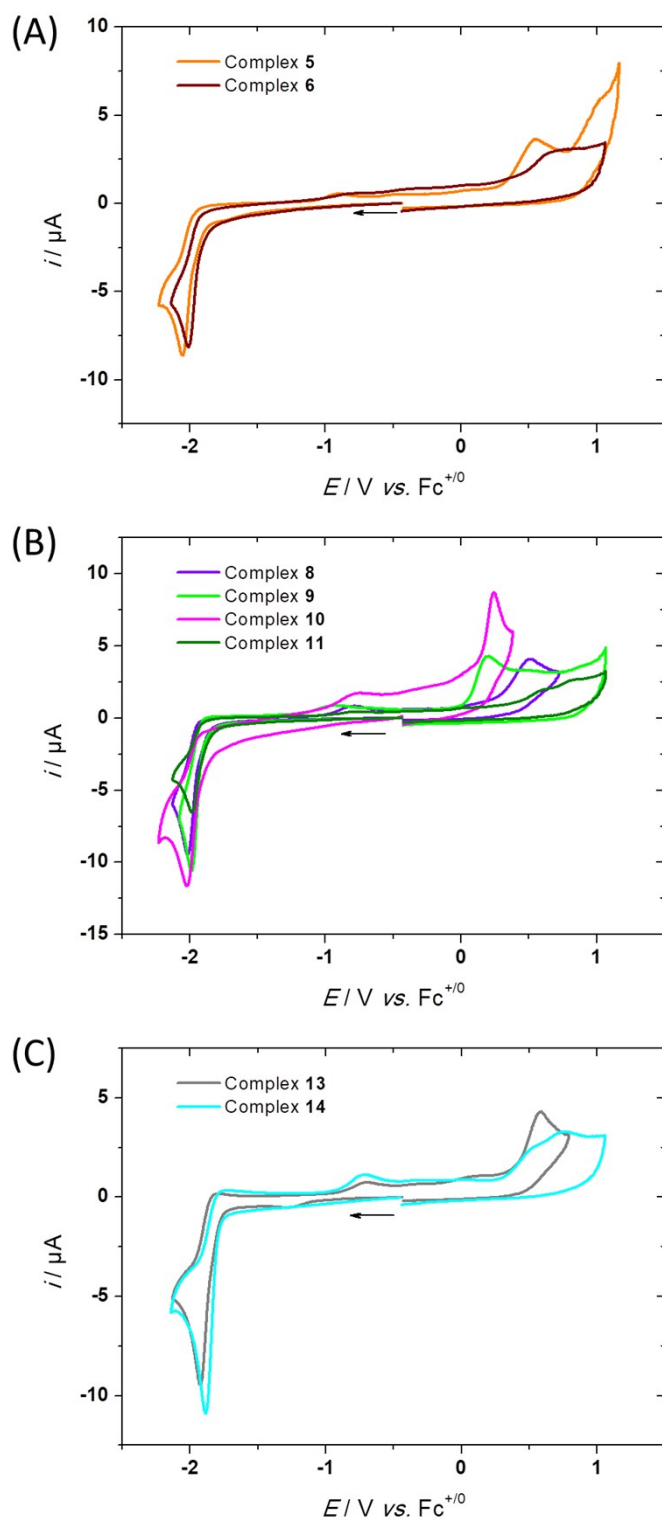

**Fig. S22** Cyclic voltammograms at a Pt working electrode ( $E / \text{V vs. Fc}^{+}/\text{Fc}$ ) of A) complexes **5** (orange) and **6** (brown); B) complexes **8** (purple), **9** (light green), **10** (pink) and **11** (olive); C) complexes **13** (gray) and **14** (cyan), in  $\text{CH}_2\text{Cl}_2/\text{NBu}_4\text{PF}_6$  0.1 M under inert atmosphere.  $C = 0.5 \text{ mM}$ .

### Additional Photophysical Data

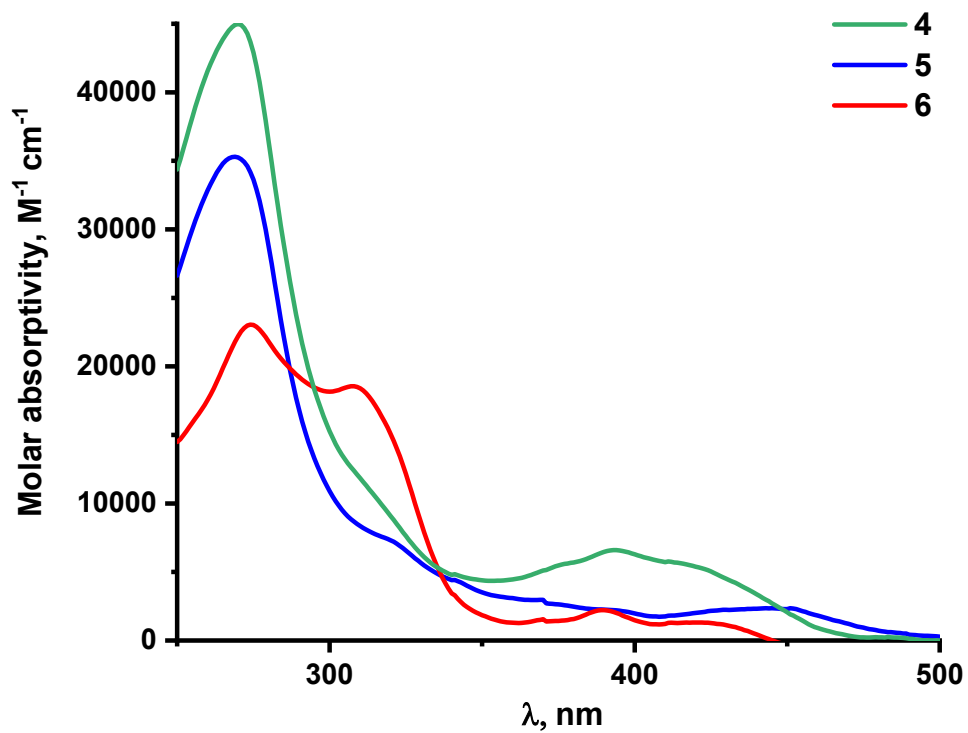

Fig. S23 Absorption spectra of complexes 4-6 in CH<sub>2</sub>Cl<sub>2</sub> (C ~ 10<sup>-5</sup> M).

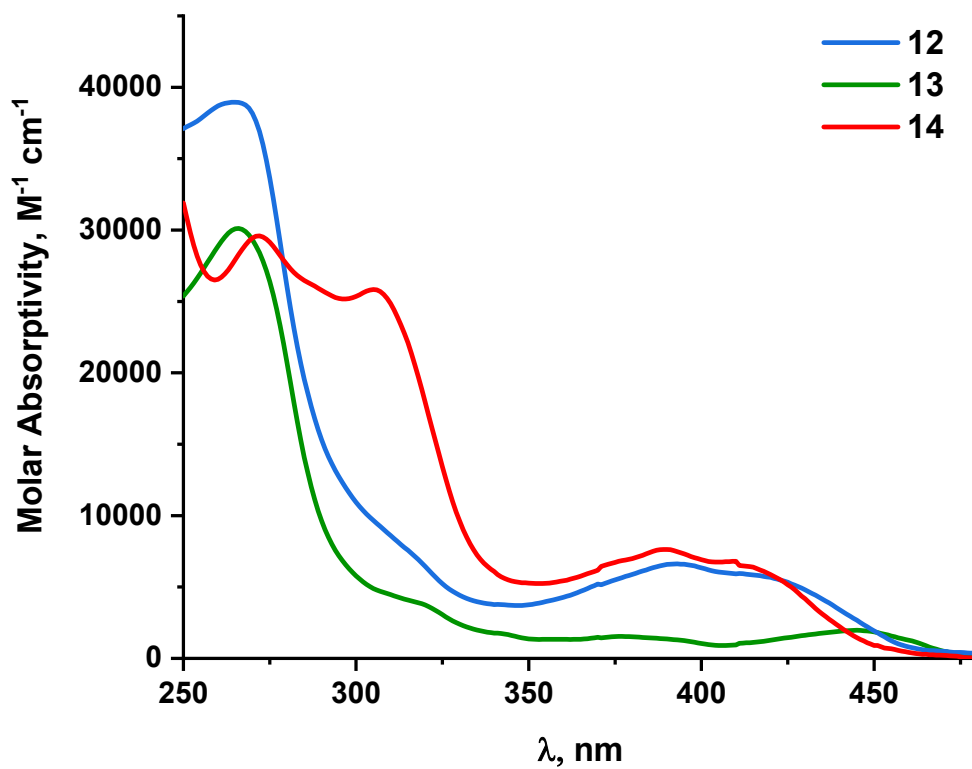

Fig. S24 Absorption spectra of complexes 12-14 in CH<sub>2</sub>Cl<sub>2</sub> (C ~ 10<sup>-5</sup> M).

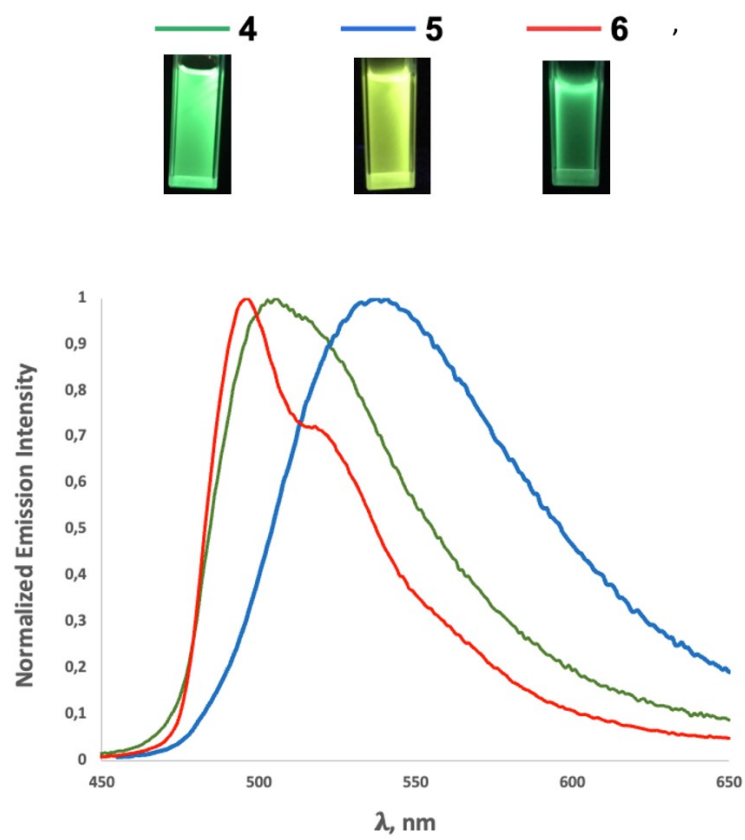

**Fig. S25** Normalized emission spectra of complexes **4-6** in deoxygenated  $\text{CH}_2\text{Cl}_2$  solution ( $C \sim 10^{-5}$  M).  $\lambda_{\text{exc}} = \lambda_{\text{abs}}^{\text{max}}$  of the lowest energy band Inset: picture of  $\text{CH}_2\text{Cl}_2$  solution taken under UV irradiation.

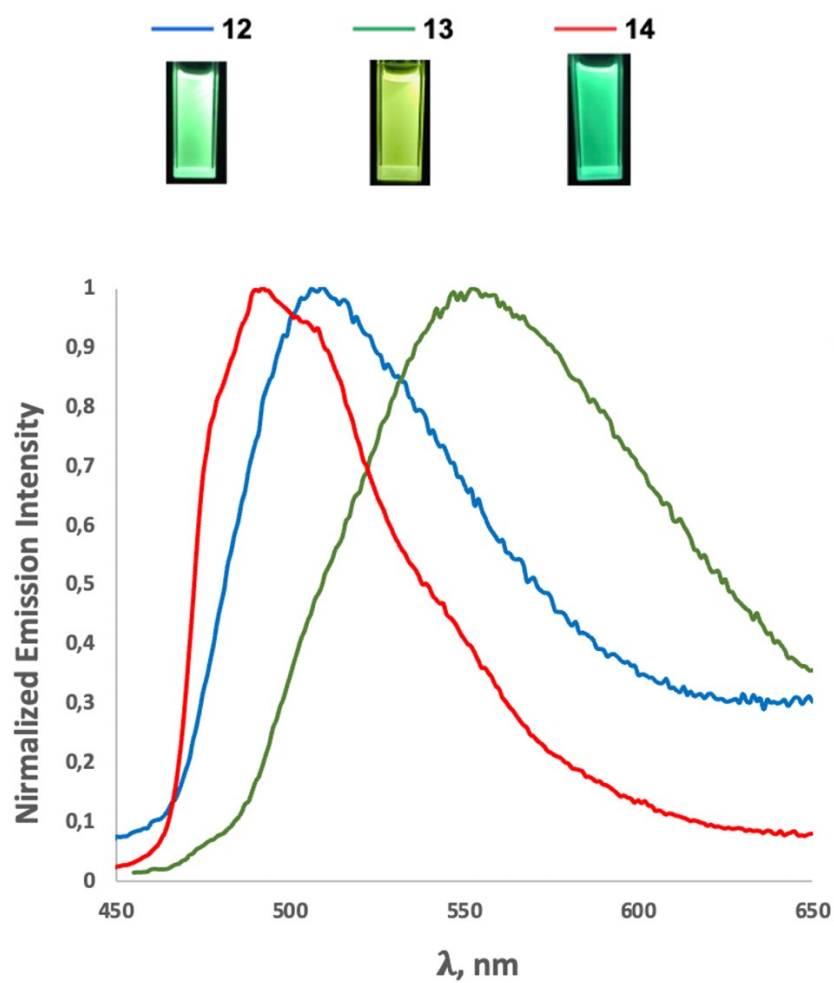

**Fig. S26** Normalized emission spectra of complexes **12-14** in deoxygenated  $\text{CH}_2\text{Cl}_2$  solution ( $C \sim 10^{-5}$  M).  $\lambda_{\text{exc}} = \lambda_{\text{max}}^{\text{abs}}$  of the lowest energy band Inset: picture of  $\text{CH}_2\text{Cl}_2$  solution taken under UV irradiation.

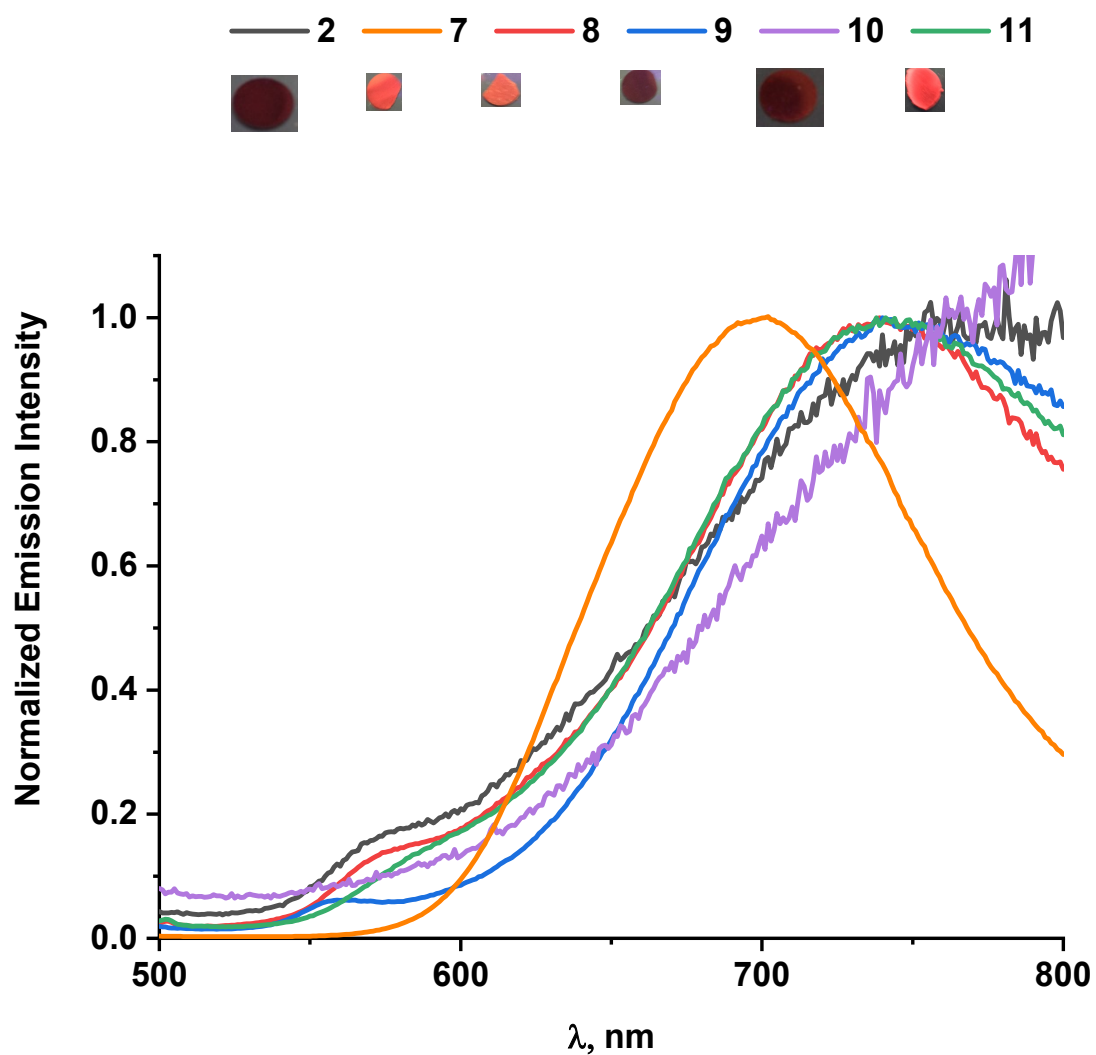

**Fig. S27** Normalized emission spectra of complexes **2**, and **7-11** in KBr matrix (2 w%).  $\lambda_{\text{exc}} = \lambda_{\text{max}}^{\text{abs}}$  of the lowest energy band in  $\text{CH}_2\text{Cl}_2$  solution. Inset: picture of KBr pellets taken under UV irradiation

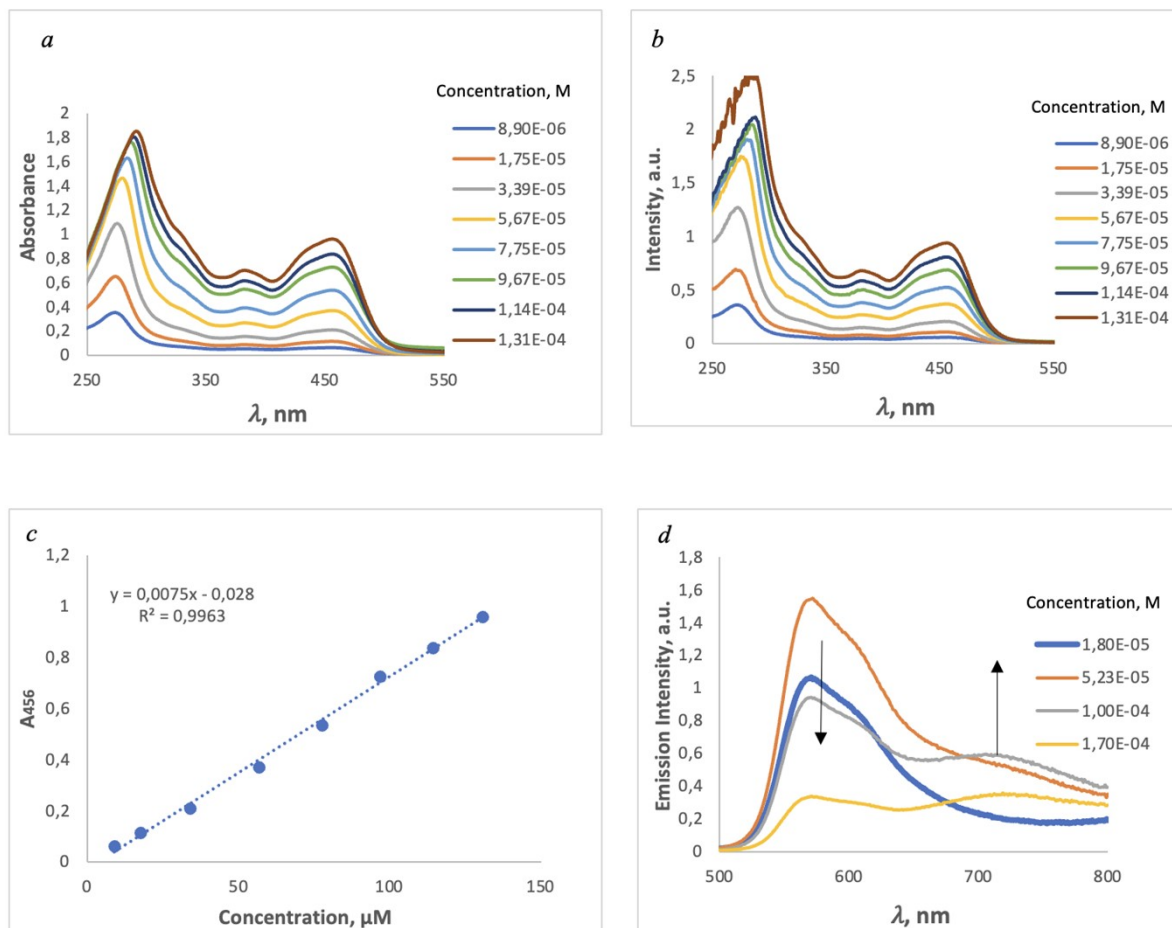

**Fig. S28 Photophysical Data for Complex 2** *a)* Absorption spectra at different concentration in  $\text{CH}_2\text{Cl}_2$  solution; *b)* excitation spectra at different concentration in  $\text{CH}_2\text{Cl}_2$  solution; *c)* Beer-Lambert law ; *b)* emission spectra at different concentration in deoxygenated  $\text{CH}_2\text{Cl}_2$  solution,  $\lambda_{\text{exc}} = \lambda_{\text{max}}^{\text{abs}}$  of the lowest energy band.



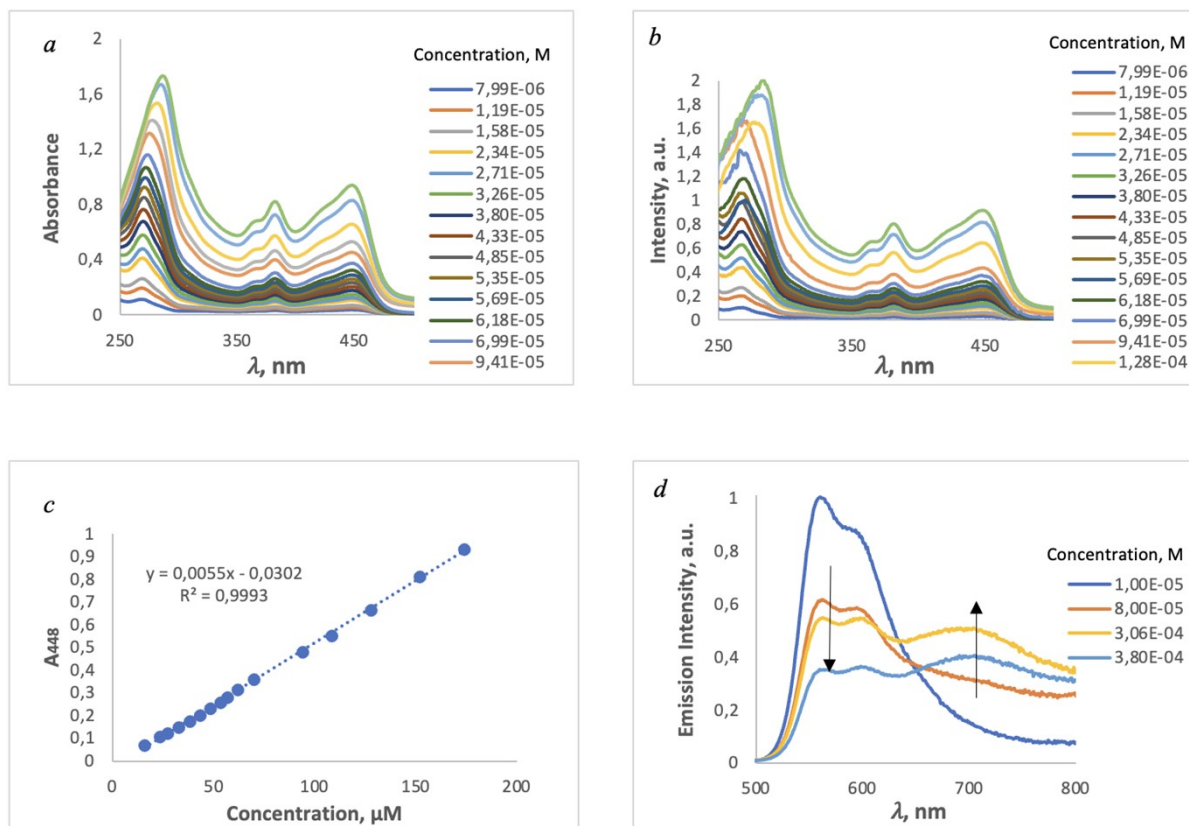

**Fig. S29 Photophysical Data for Complex 8** *a)* Absorption spectra at different concentration in  $\text{CH}_2\text{Cl}_2$  solution; *b)* excitation spectra at different concentration in  $\text{CH}_2\text{Cl}_2$  solution; *c)* Beer-Lambert law; *d)* emission spectra at different concentration in deoxygenated  $\text{CH}_2\text{Cl}_2$  solution,  $\lambda_{\text{exc}} = \lambda_{\text{max}}^{\text{abs}}$  of the lowest energy band.

## Additional Theoretical Results

**Table S4.** Major computed optical transitions  $\lambda$  (nm) contributing to the simulated absorption band of lowest energy (see Table 3) and their dominant character. Oscillator strengths are provided in parentheses.

|           | $\lambda$ (osc. strenght) | Major contribution         |
|-----------|---------------------------|----------------------------|
| <b>1</b>  | 386 (0.1293)              | H->L (+96%)                |
| <b>2</b>  | 429 (0.1313)              | H->L (+91%)                |
| <b>3</b>  | 383 (0.1117)              | H->L (+96%)                |
| <b>4</b>  | 422 (0.0156)              | H->L (+98%)                |
|           | 386 (0.0566)              | H-1→L+1 (79%), H→L+1 (19%) |
| <b>5</b>  | 464 (0.1475)              | H->L (+97%)                |
| <b>6</b>  | 420 (0.2341)              | H→L (97%)                  |
|           | 395 (0.0619)              | H->L (96%)                 |
|           | 384 (0.1139)              | H-1→L+1 (95%)              |
| <b>7</b>  | 461 (0.1037)              | H→L (83%), H→L+1 (15%)     |
|           | 448 (0.1006)              | H→L+1 (82%), H→L (15%)     |
| <b>8</b>  | 482 (0.1274)              | H→L+1 (62%), H→L (35%)     |
|           | 470 (0.0746)              | H→L (61%), H→L+1 (35%)     |
| <b>9</b>  | 433 (0.0485)              | H→L (67%), H→L+1 (31%)     |
|           | 424 (0.1354)              | H→L+1 (67%), H→L (31%)     |
| <b>10</b> | 434 (0.0614)              | H→L (75%), H→L+1 (23%)     |
|           | 425 (0.1338)              | H→L+1 (74%), H→L (23%)     |
| <b>11</b> | 505 (0.2127)              | H→L (71%), H→L+1 (20%)     |
|           | 490 (0.0434)              | H→L+1 (72%), H→L (20%)     |
| <b>12</b> | 434 (0.1577)              | H→L+1 (97%)                |
| <b>13</b> | 467 (0.1745)              | H→L+1 (97%)                |
| <b>14</b> | 385 (0.0851)              | H-1→L+1 (97%)              |
|           | 384 (0.0928)              | H-1→L (95%)                |

**Table S5.** Relevant computed interatomic distances (in Å) and corresponding Wiberg bond indices (WBI) into bracket. for complexes **1-14**.

| Compound                             | 1                | 2                | 3                | 4                | 5                | 6                | 7                | 8                | 9                | 10               | 11               | 12               | 13               | 14               |
|--------------------------------------|------------------|------------------|------------------|------------------|------------------|------------------|------------------|------------------|------------------|------------------|------------------|------------------|------------------|------------------|
| <b>Pt-N</b><br>[WBI]                 | 2.035<br>[0.414] | 2.035<br>[0.414] | 2.036<br>[0.414] | 2.038<br>[0.414] | 2.038<br>[0.414] | 2.039<br>[0.413] | 2.039<br>[0.414] | 2.039<br>[0.414] | 2.040<br>[0.412] | 2.041<br>[0.412] | 2.040<br>[0.414] | 2.038<br>[0.414] | 2.038<br>[0.414] | 2.040<br>[0.413] |
| <b>Pt-C<sub>NACAN</sub></b><br>[WBI] | 1.905<br>[0.776] | 1.906<br>[0.763] | 1.901<br>[0.784] | 1.939<br>[0.630] | 1.938<br>[0.631] | 1.940<br>[0.628] | 1.940<br>[0.620] | 1.939<br>[0.621] | 1.941<br>[0.619] | 1.941<br>[0.619] | 1.940<br>[0.621] | 1.935<br>[0.636] | 1.935<br>[0.638] | 1.937<br>[0.635] |
| <b>Pt-Cl or Pt-CCR</b><br>[WBI]      | 2.425<br>[0.288] | 2.424<br>[0.289] | 2.421<br>[0.294] | 2.047<br>[0.474] | 2.047<br>[0.474] | 2.043<br>[0.480] | 2.046<br>[0.477] | 2.047<br>[0.476] | 2.042<br>[0.482] | 2.042<br>[0.482] | 2.047<br>[0.477] | 2.045<br>[0.478] | 2.045<br>[0.477] | 2.042<br>[0.482] |
| <b>C≡C</b><br>[WBI]                  | -                | -                | -                | 1.225<br>[2.741] | 1.225<br>[2.742] | 1.226<br>[2.709] | 1.225<br>[2.736] | 1.226<br>[2.740] | 1.226<br>[2.707] | 1.226<br>[2.704] | 1.226<br>[2.732] | 1.225<br>[2.740] | 1.225<br>[2.742] | 1.225<br>[2.713] |

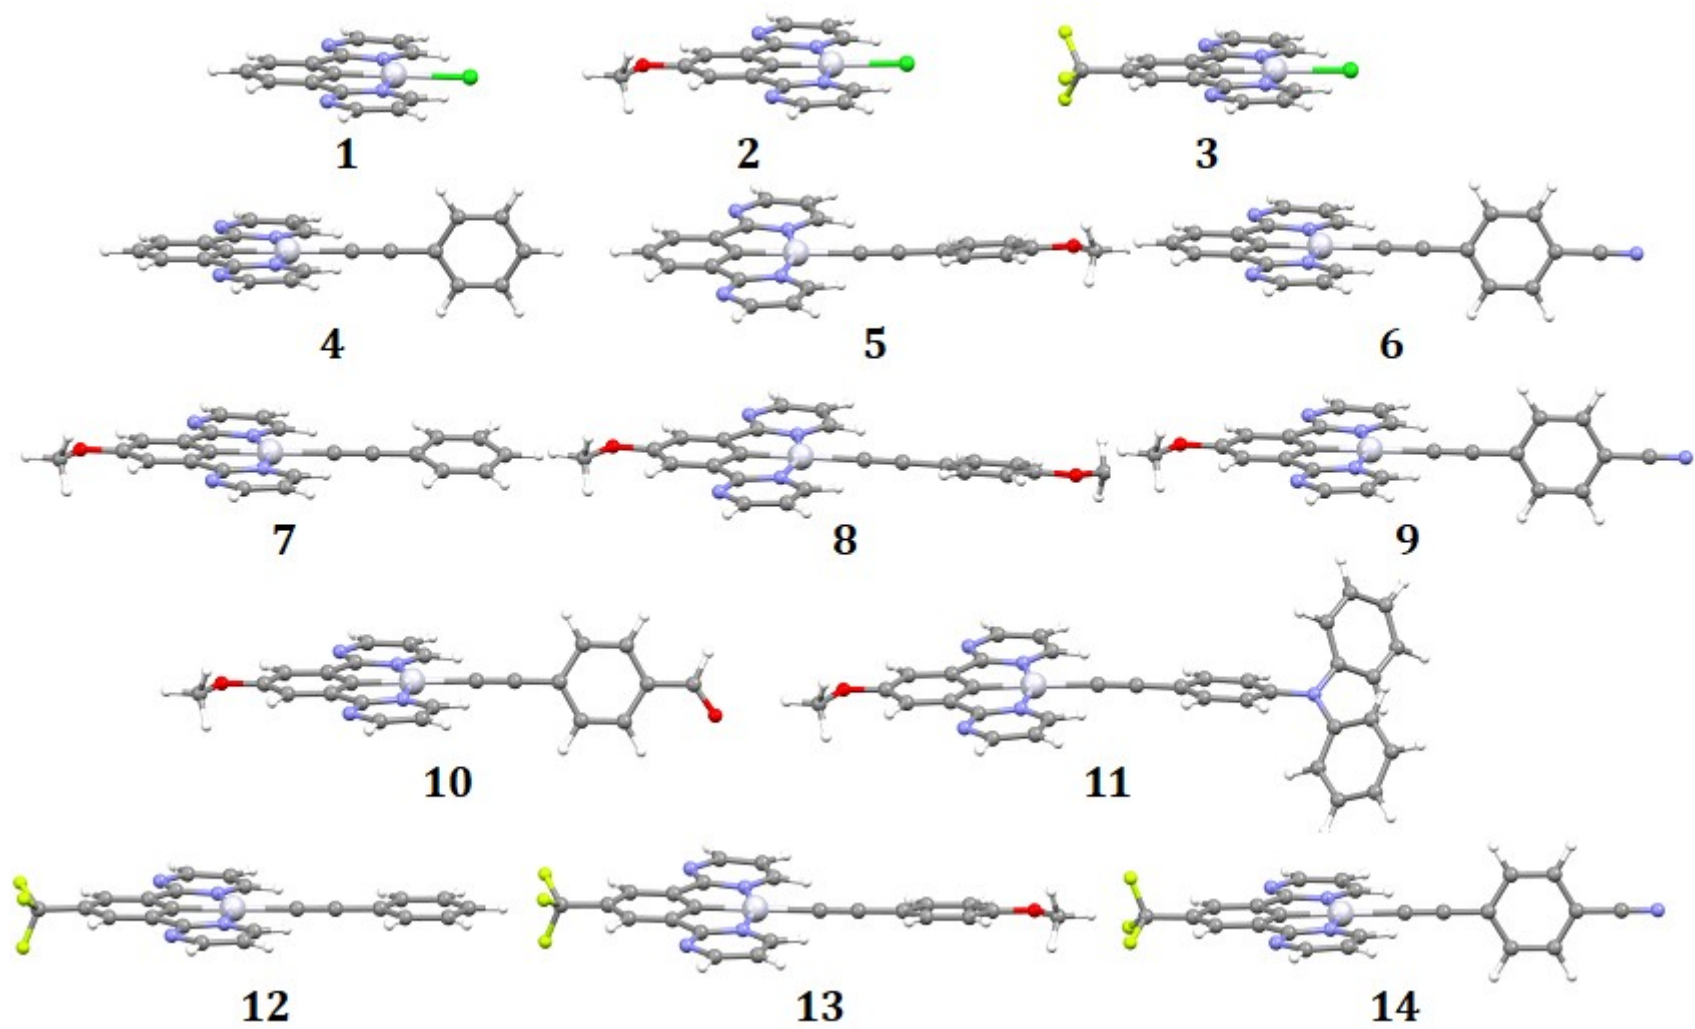

**Fig. S30** DFT-optimized structures of compounds 1-14.

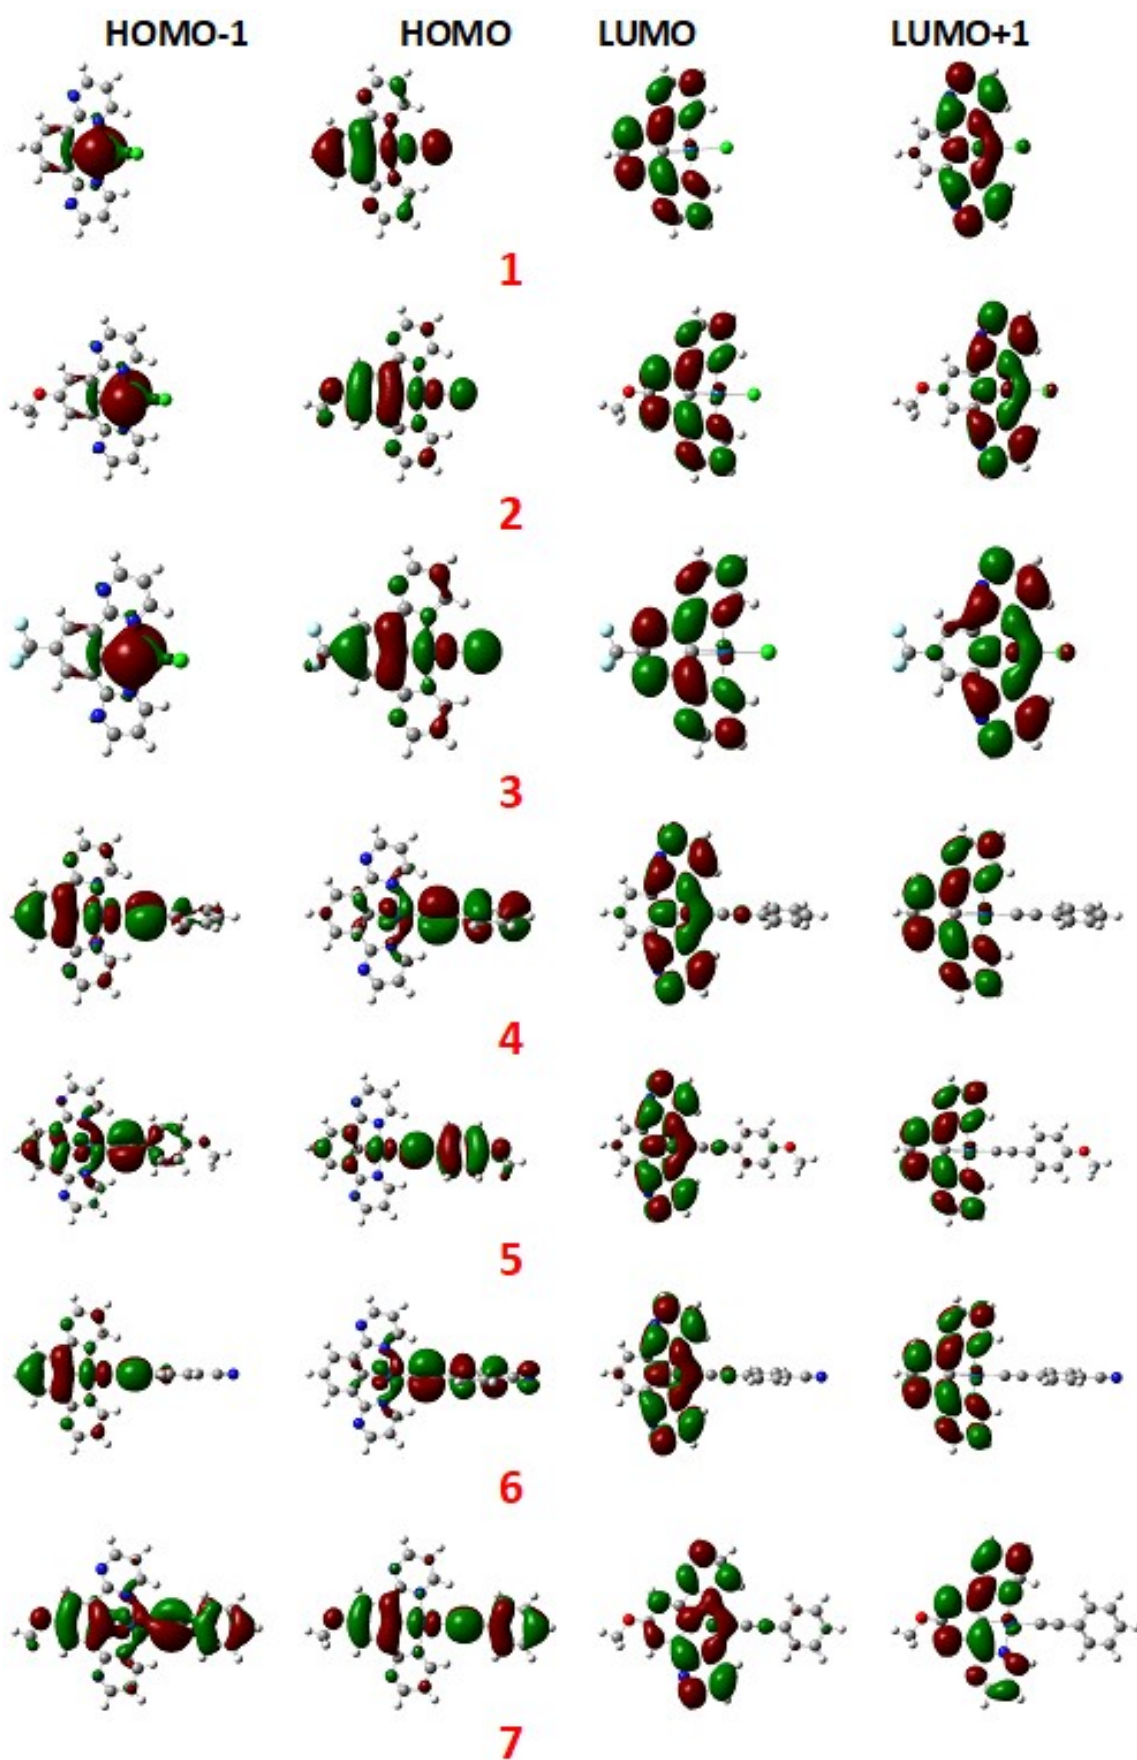

Fig. S31a The frontier orbitals of complexes 1-7

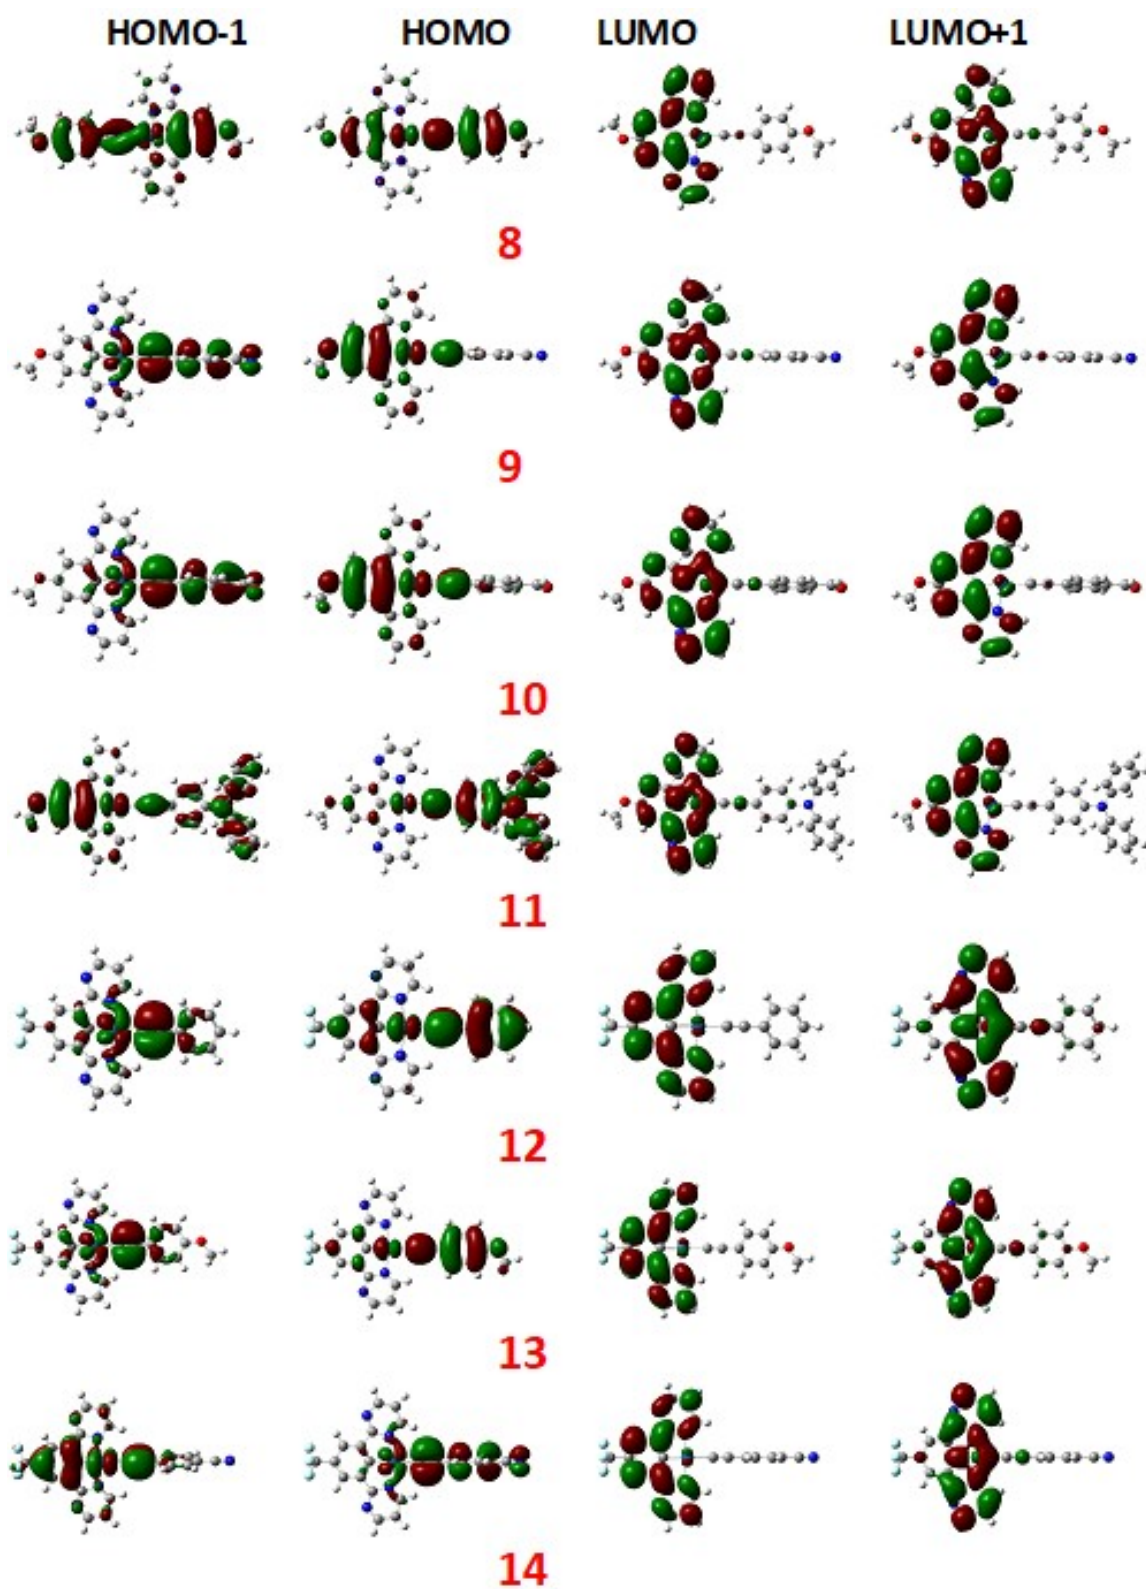

Fig. S31b The frontier orbitals of complexes 8-14

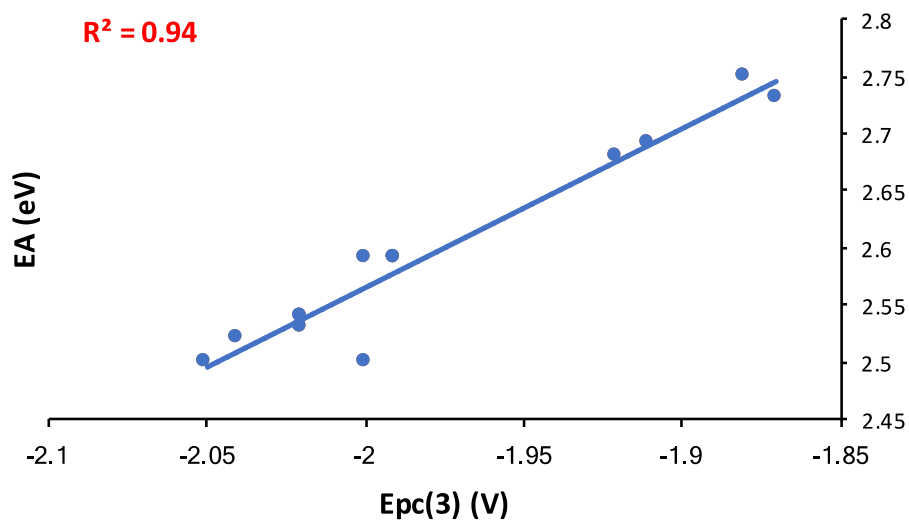

**Fig. S32** Relationship between the experimental electrochemical  $E_{pc}(3)$  values and the DFT-computed electron affinities (EA).

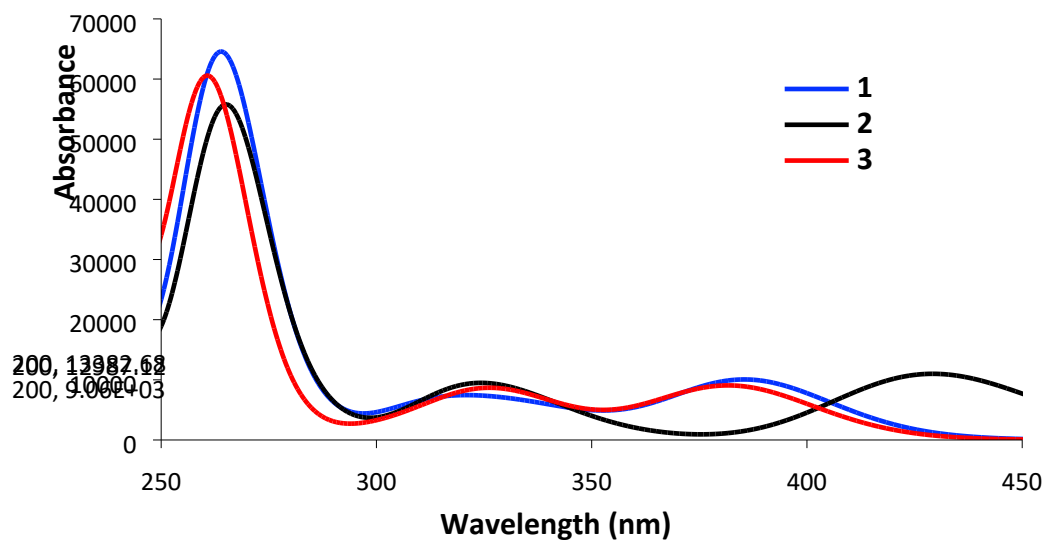

**Fig. S33** TD-DFT-simulated UV/vis spectra of compounds **1-3**



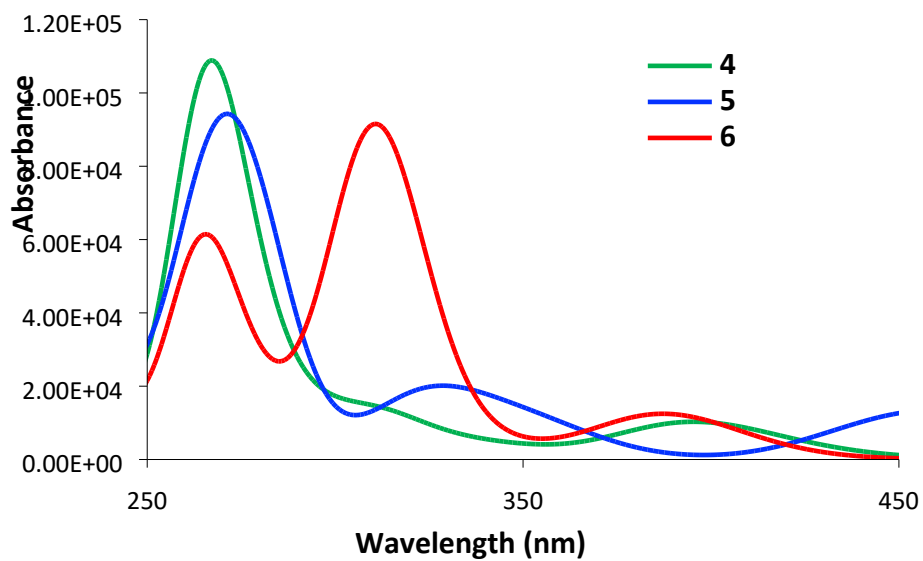

**Fig. S34** TD-DFT-simulated UV/vis spectra of compounds 4-6

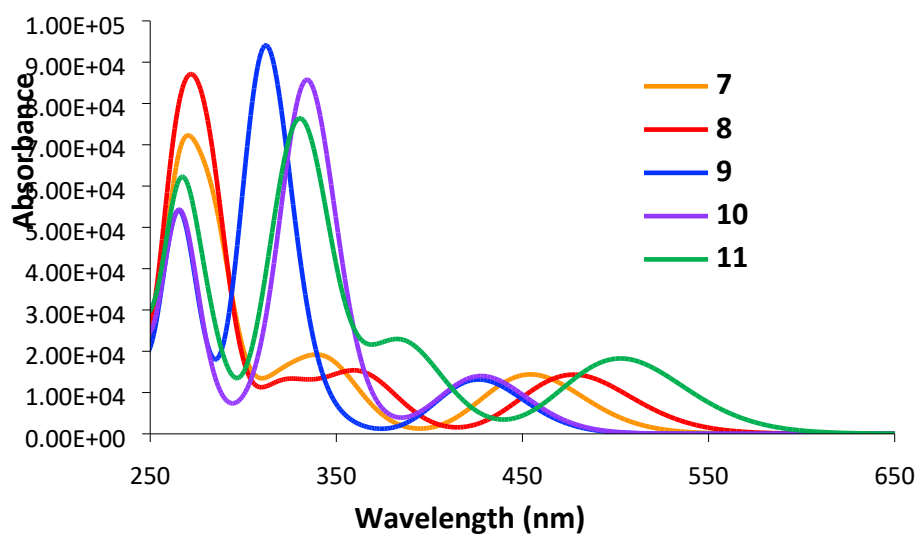

**Fig. S35** TD-DFT-simulated UV/vis spectra of compounds 7-11



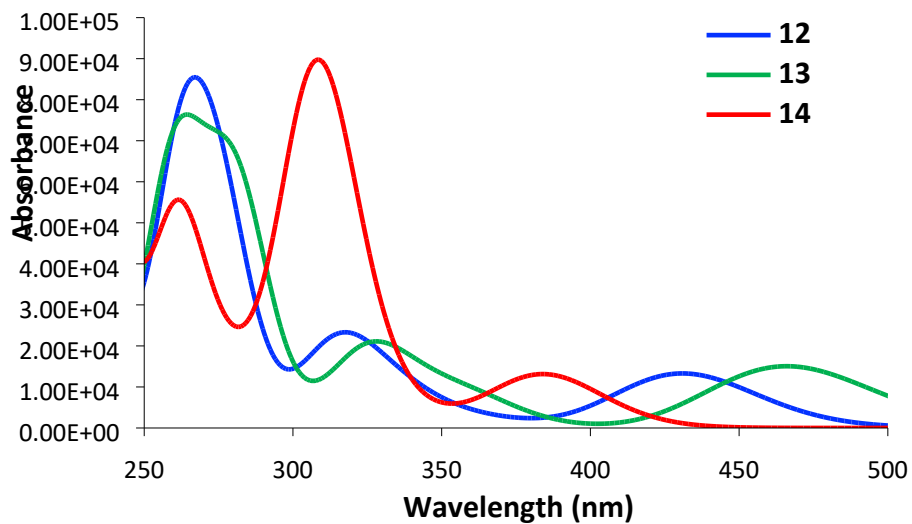

**Fig. S36** TD-DFT-simulated UV/vis spectra of compounds **12-14**

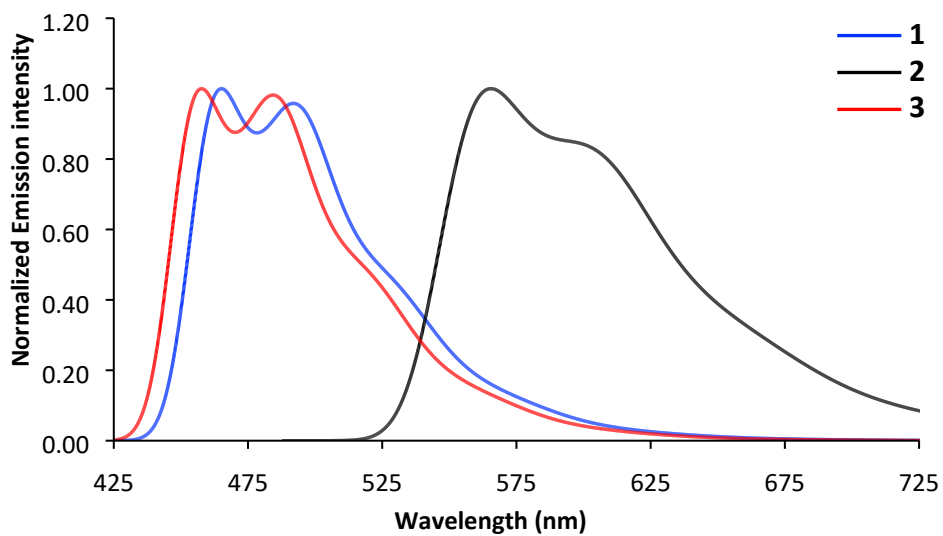

**Fig. 37** DFT-simulated phosphorescence spectra of compounds **1-3**

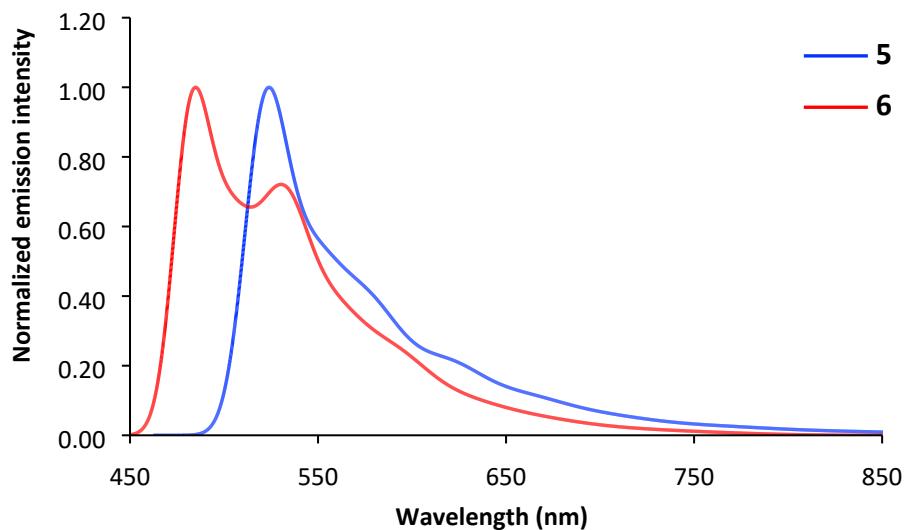

**Fig. S38** DFT-simulated phosphorescence spectra of compounds **5** and **6**

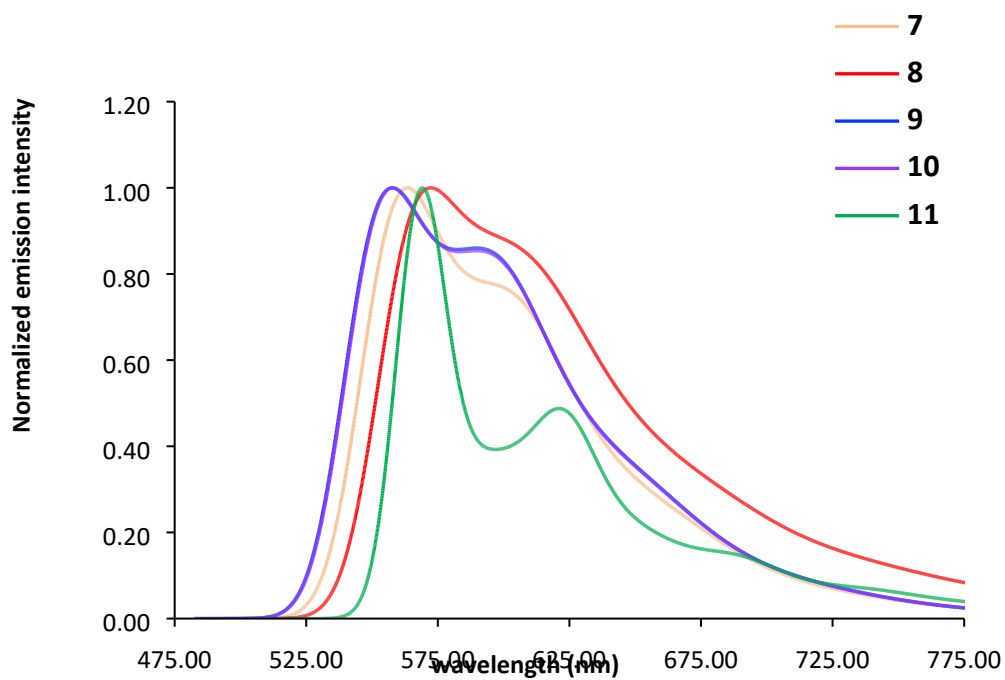

**Fig. S39** DFT-simulated phosphorescence spectra of compounds **7-11**

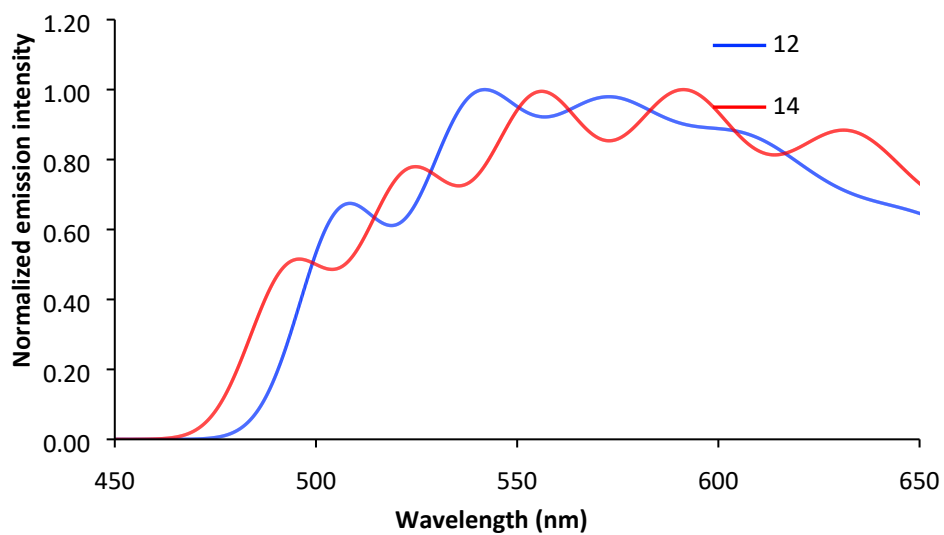

**Fig. S40** DFT-simulated phosphorescence spectra of compounds **12** and **14**

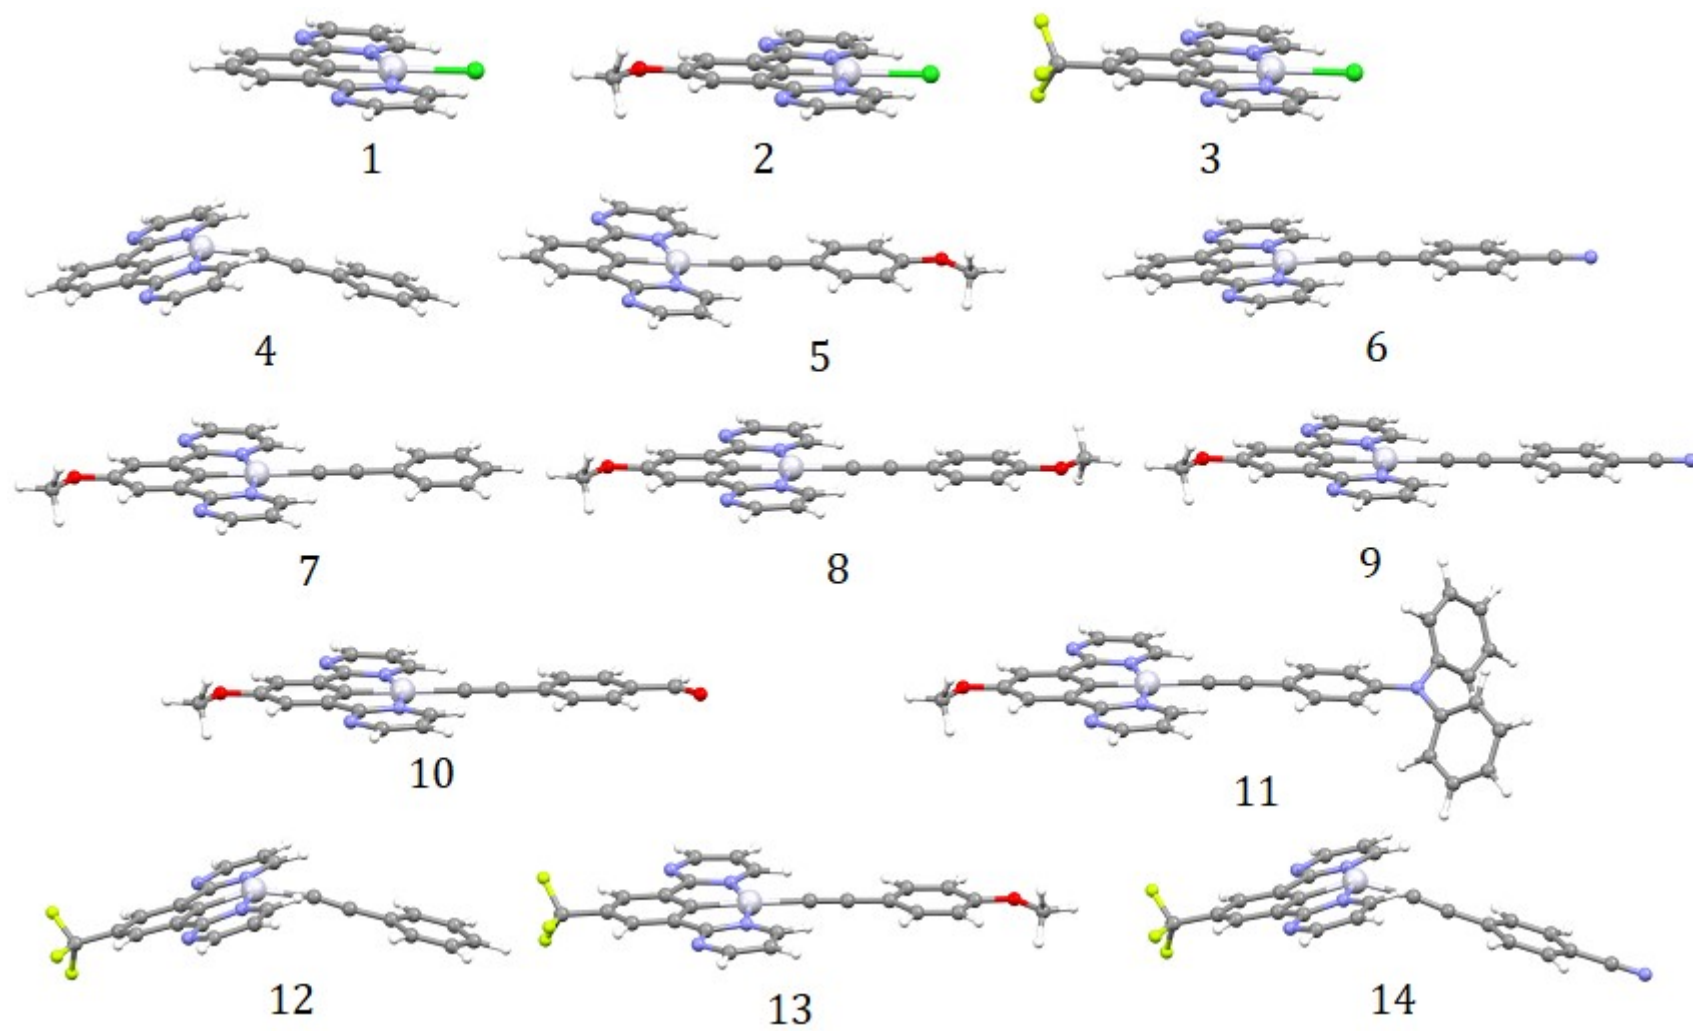

**Fig. S41** DFT-optimized structures of the lowest triplet stated of compounds **1-14**.

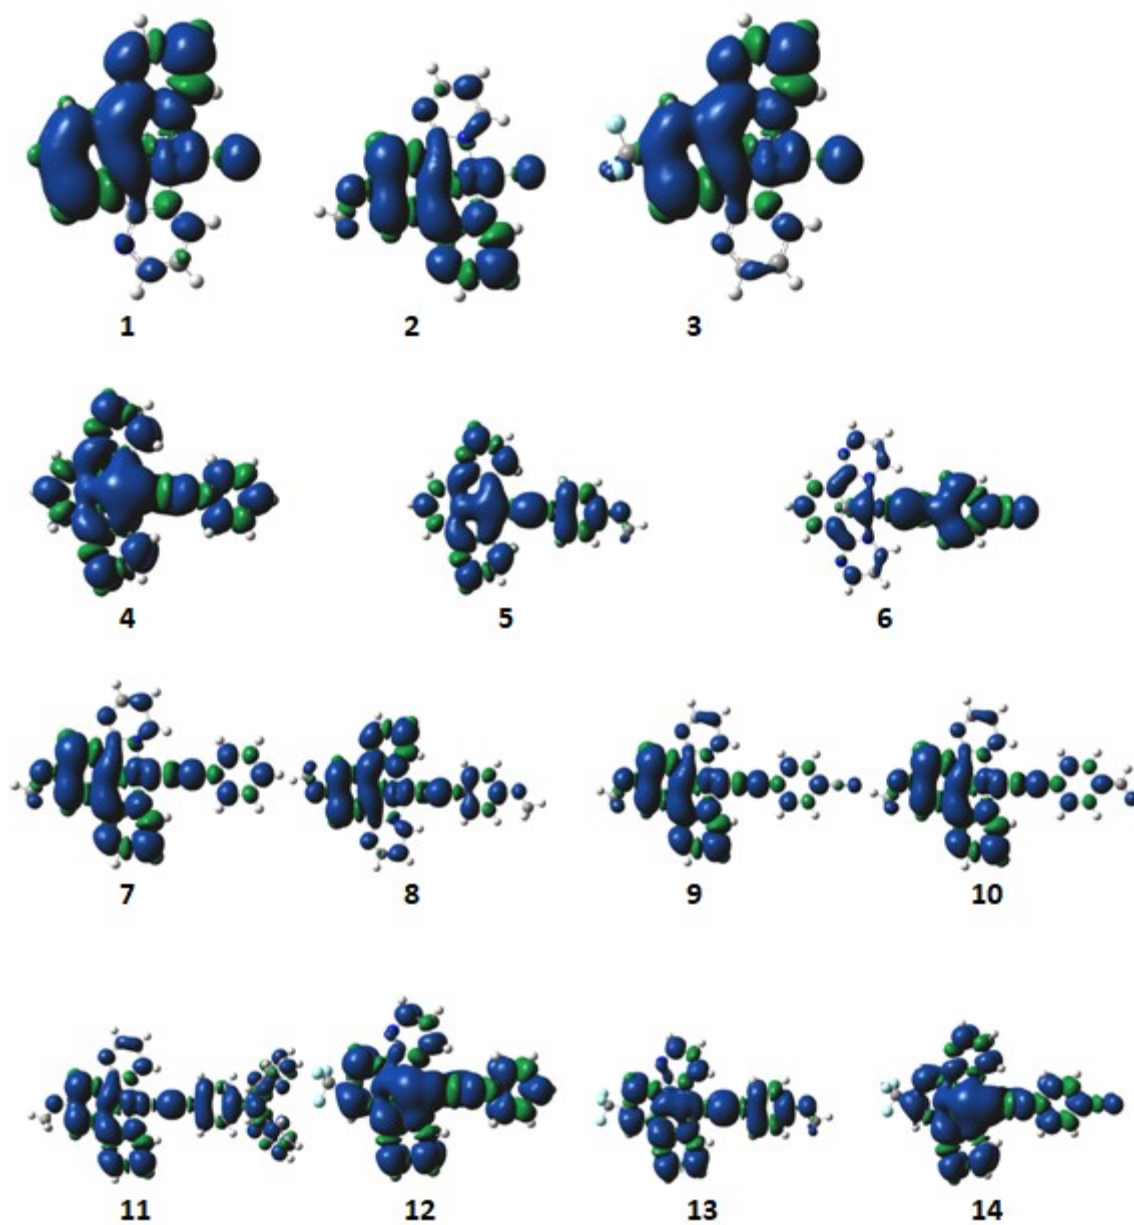

**Fig. S42** Spin densities of the lowest triplet state of complexes **1-14**.

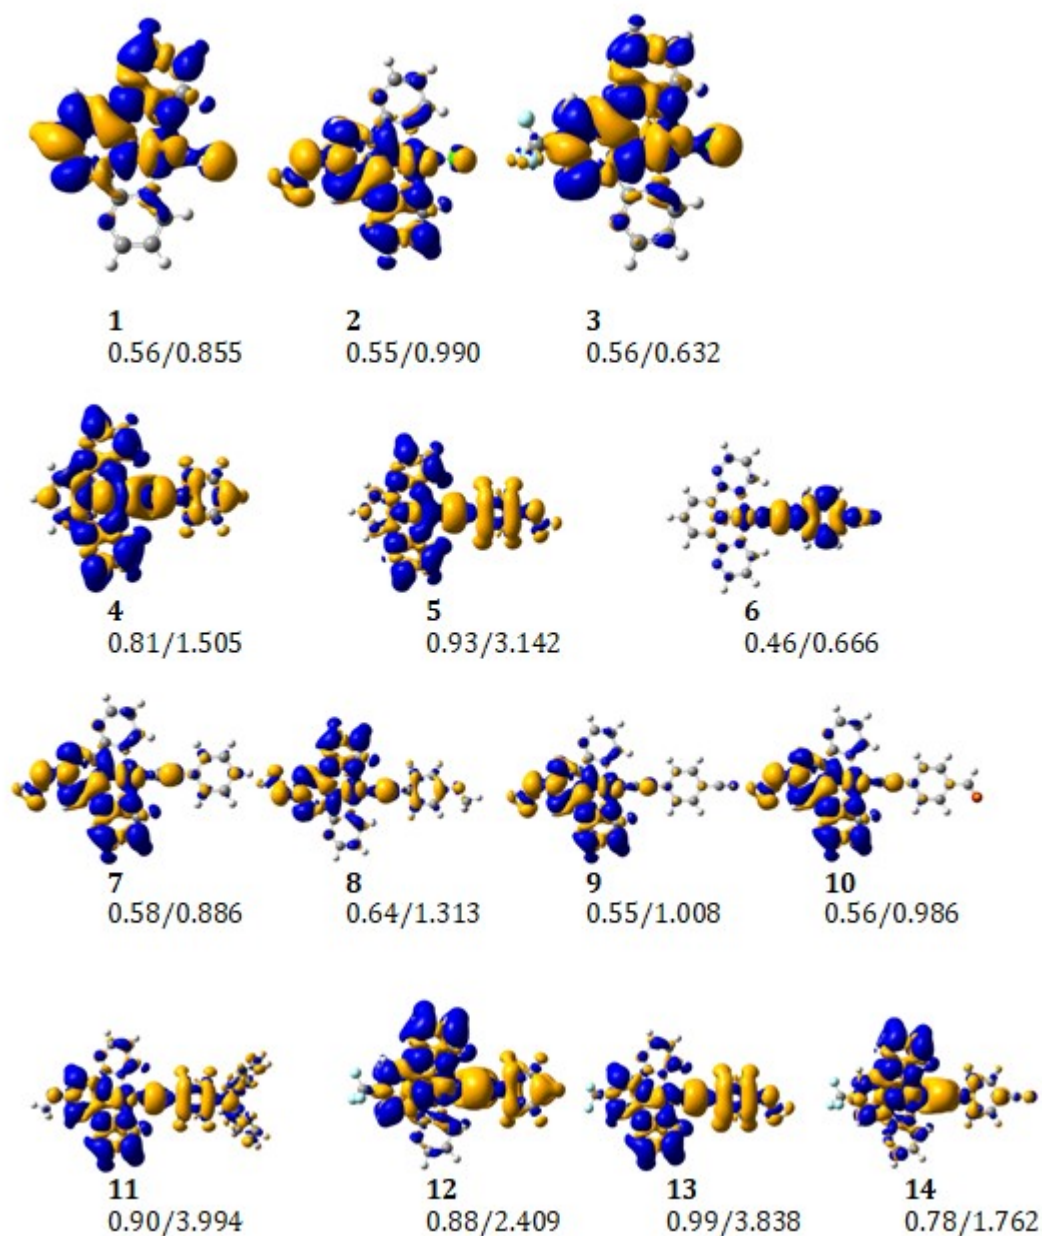

**Fig. S43** Density difference plots associated with the triplet→singlet emissive transitions. The blue and yellow colors indicate an increase and decrease of density upon de-excitation, respectively. The numerical values are the computed charge transfers ( $q^{\text{CT}}$ ) and corresponding distance transfer ( $d^{\text{CT}}$ , in Å), respectively (see Computational details).

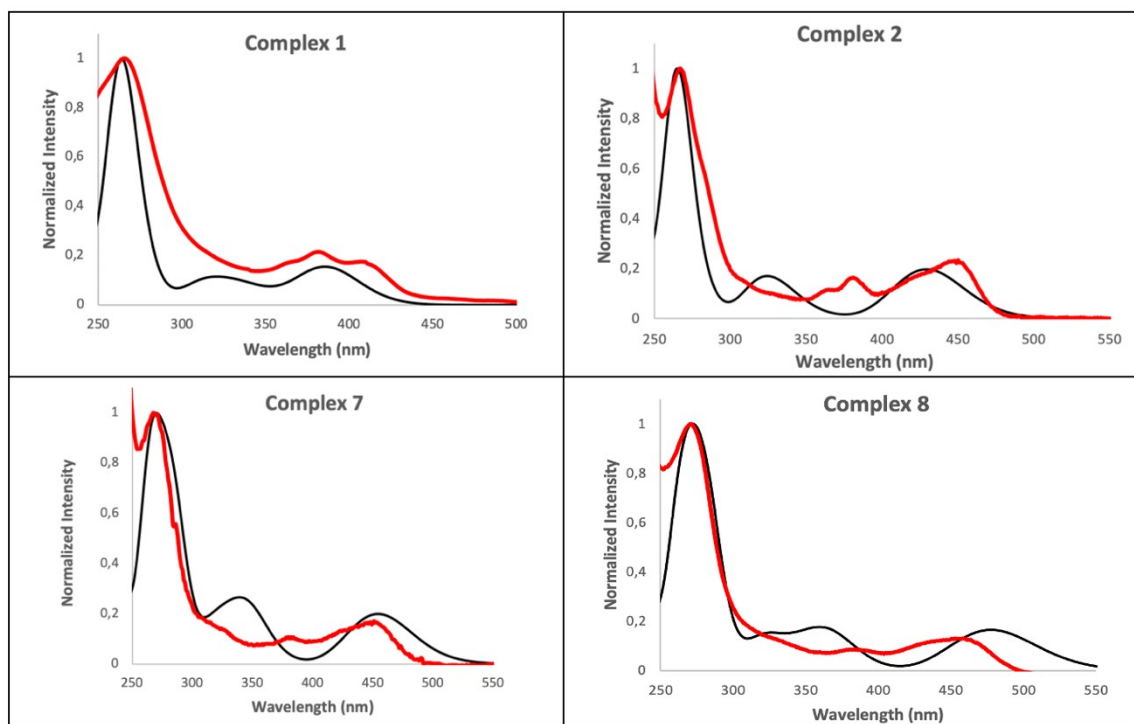

**Fig. S44** Comparison of absorption spectra theoretical (black line) and practical (red line) of complexes **1**, **2**, **7** and **8** in  $\text{CH}_2\text{Cl}_2$  solution

## References

- [1] Sheldrick, G. M. SHELXT - Integrated Space-group and Crystal-structure Determination. *Acta Cryst.*, **2015**, A71, 3–8.
- [2] Sheldrick, G. M. Crystal Structure Refinement with SHELXL. *Acta Cryst.*, **2015**, C71, 3–8.
